# Supplementary material
Source: PubMed Central journal article supplement (PMC5881049)
Supplement: AEM.02615-17_zam008188428s1.pdf [file AEM.02615-17_zam008188428s1.pdf]

Supplemental Materials

# Nitrogen Cycle Evaluation (NiCE) Chip for the Simultaneous Analysis of Multiple N-Cycle Associated Genes

Mamoru Oshiki<sup>a,§</sup>, Takahiro Segawa<sup>b,c,§</sup>, and Satoshi Ishii<sup>d,#</sup>

<sup>a</sup> Department of Civil Engineering, National Institute of Technology, Nagaoka College, Nagaoka, Japan

<sup>b</sup> Center for Life Science Research, University of Yamanashi, Yamanashi, Japan

<sup>c</sup> National Institute of Polar Research, Tokyo, Japan

<sup>d</sup> Department of Soil, Water, and Climate; BioTechnology Institute, University of Minnesota, St. Paul, MN

§ These authors contributed equally.

# Address correspondence to Satoshi Ishii, ishi0040@umn.edu

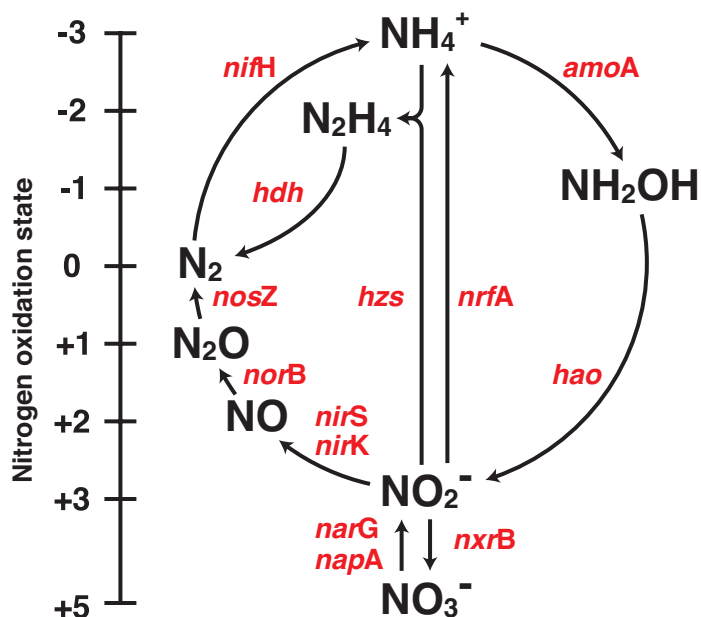

**Figure S1.** Nitrogen cycle and the associated functional genes.



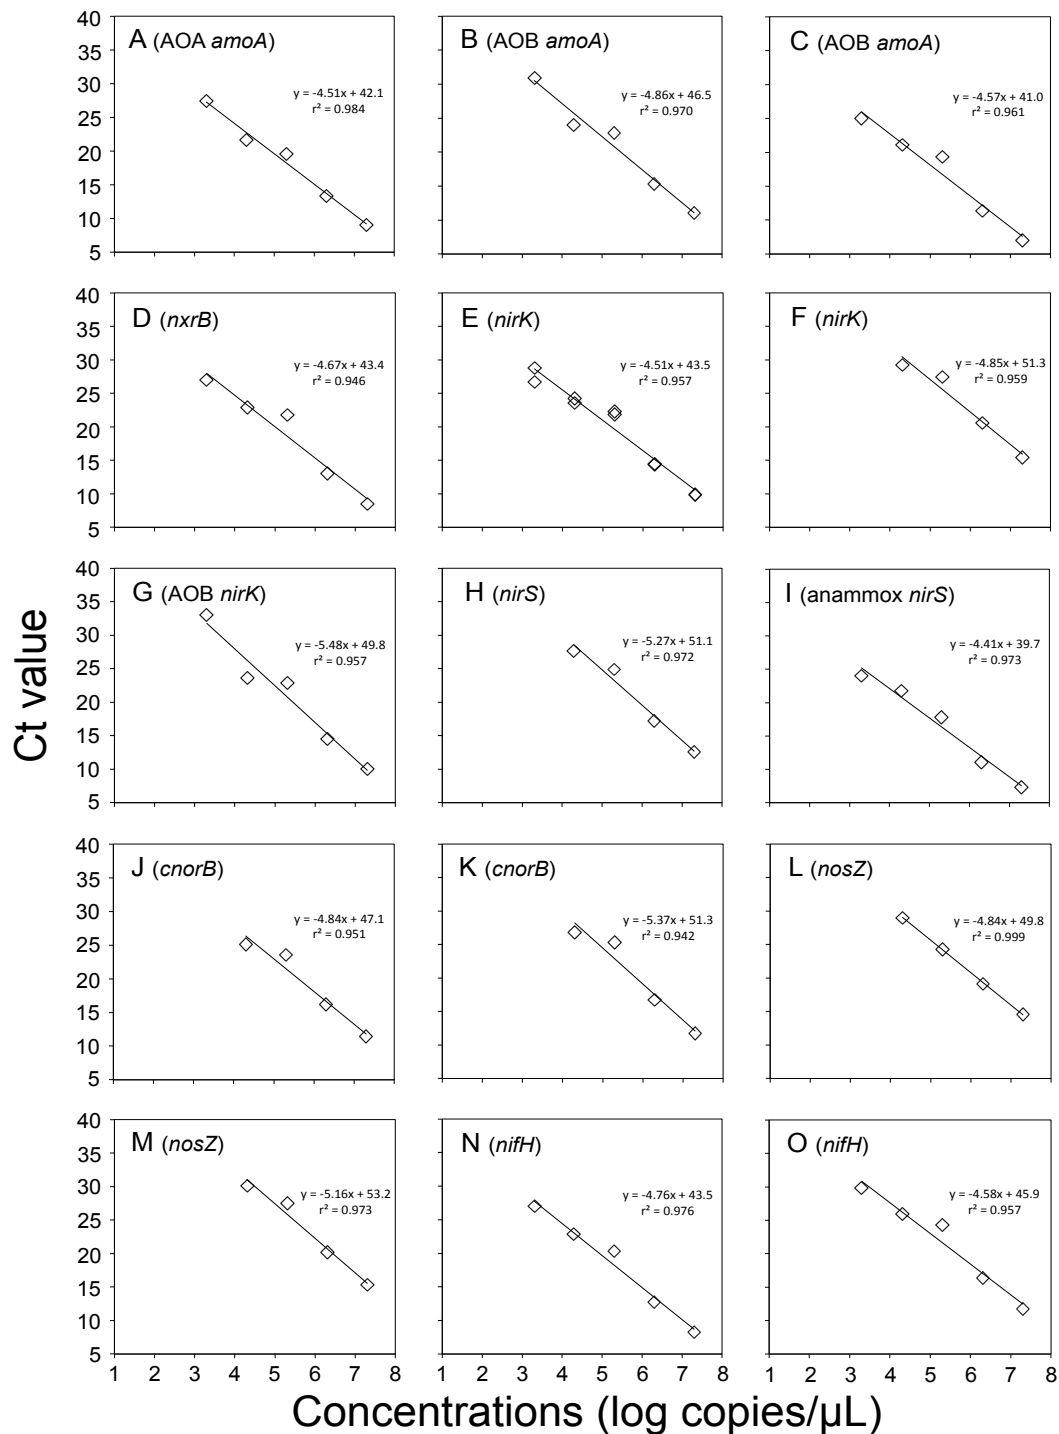

**Figure S3.** Standard curves generated based on the results of the NiCE chip assays. Legend: A, AOA *amoA* amplified using Arch-*amoA*-for and Arch-*amoA*-rev primers; B, AOB *amoA* amplified using *amoA*\_F1 and *amoA*\_F1\_R2 primers; C, AOB *amoA* amplified using *amoA*\_F1 and *amoA*\_2R primers; D, *nxrB* amplified using *nxrB*169f and *nxrB*638r primers; E, *nirK* amplified using FlaCu and R3Cu primers; F, *nirK* amplified using *nirK*876 and *nirK*1040 primers; G, *N. europaea*- and *N. eutropha*-specific *nirK* amplified using *nirK*\_166F and *nirK*\_665R primers; H, *nirS* amplified using *nirS*Cd3aF and *nirS*R3cd primers; I, Anammox *nirS* amplified using *Scnir*372F and *Scnir*845R primers; J, *cnorB* amplified using *cnorB*2 and *cnorB*6 primers; K, *cnorB* amplified using *cnorB*-2F and *cnorB*-6R primers; L, *nosZ* amplified using *nosZ*1F and *nosZ*1R primers; M, *nosZ* amplified using *nosZ*2F and *nosZ*2R primers; N, *nifH* amplified using *nifH*F and *nifH*R primers; O, *nifH* amplified using IGK3 and DVV primers.

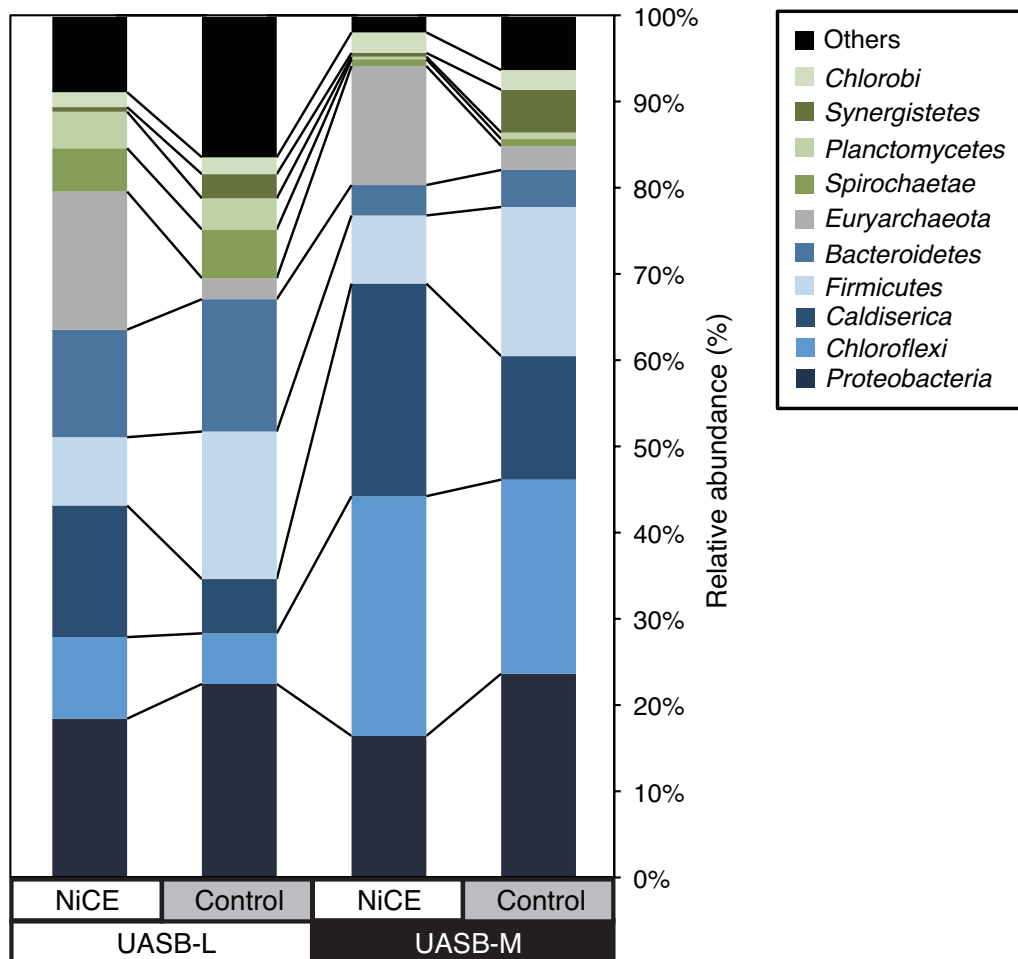

**Figure S4.** Microbial community structures in UASB-L and UASB-M samples as assessed by the 16S rRNA gene sequencing. The PCR amplification was done by using the NiCE chip (designated as NiCE) and by conventional PCR (control). Phylogenetic affiliations the 16S rRNA gene sequences were identified using a blastn search against reference sequences into bacterial and archaeal phyla.

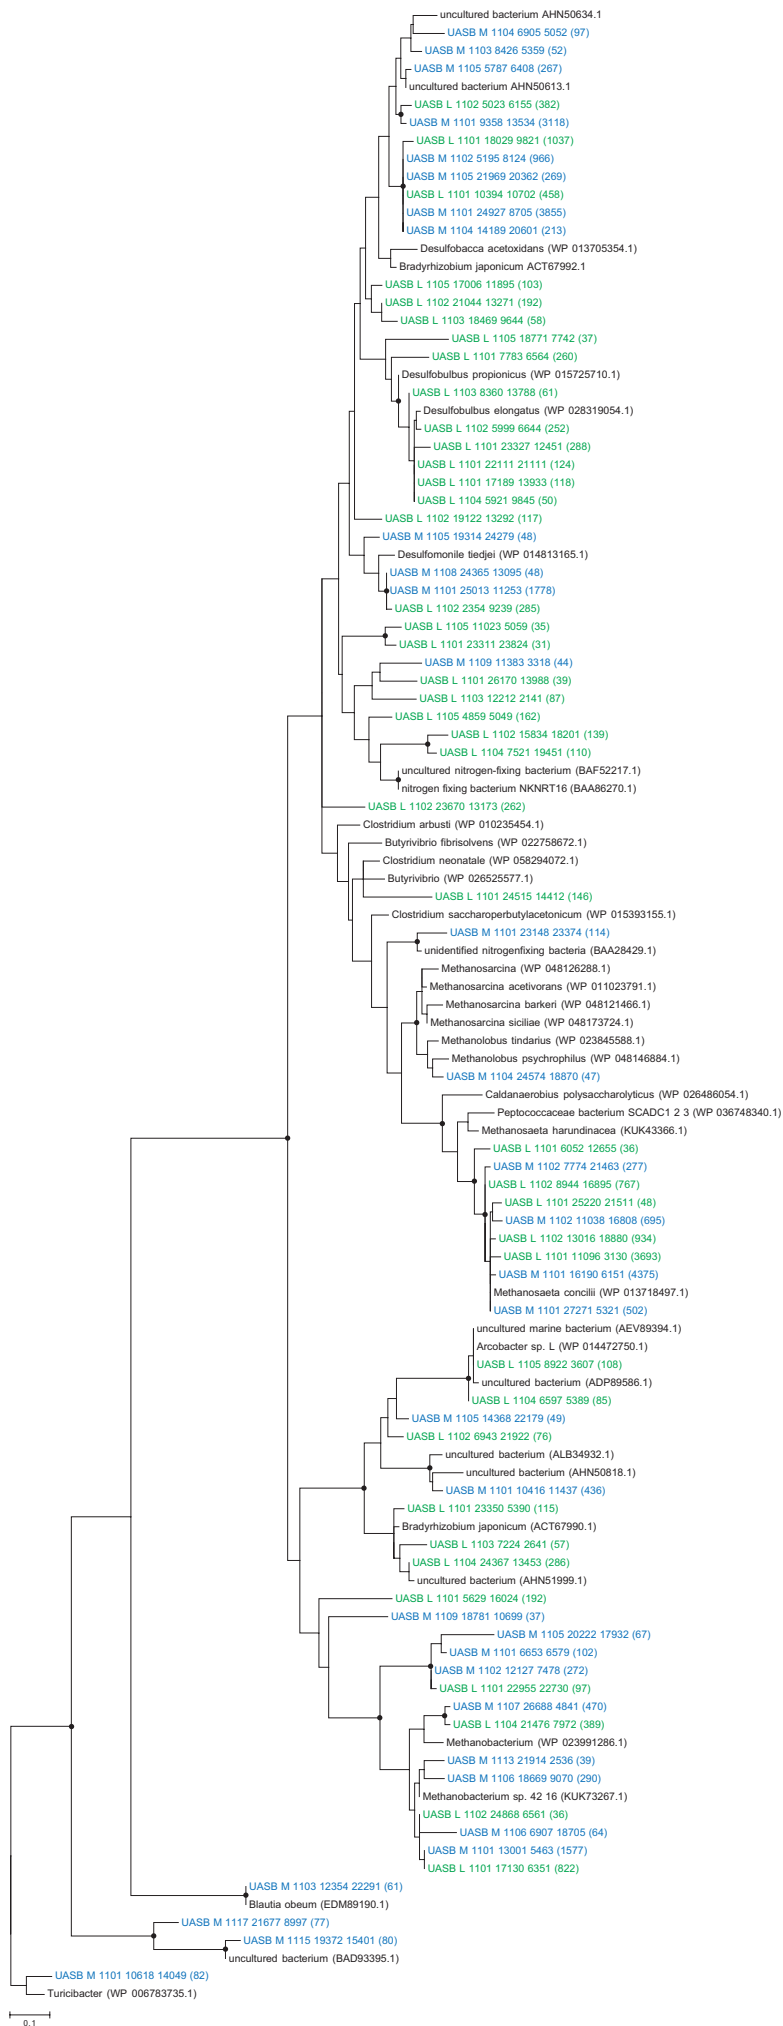

**Figure S5.** Maximum-likelihood tree showing the phylogenetic affiliation of the *nifH* sequences obtained from UASB-M (blue) and UASB-L (green) samples. Operational taxonomic units (OTUs) determined based on 95% sequence similarity are shown. Numbers in parentheses indicate the number of sequence reads affiliated to the OTU. The scale bar represents 10% sequence divergence.

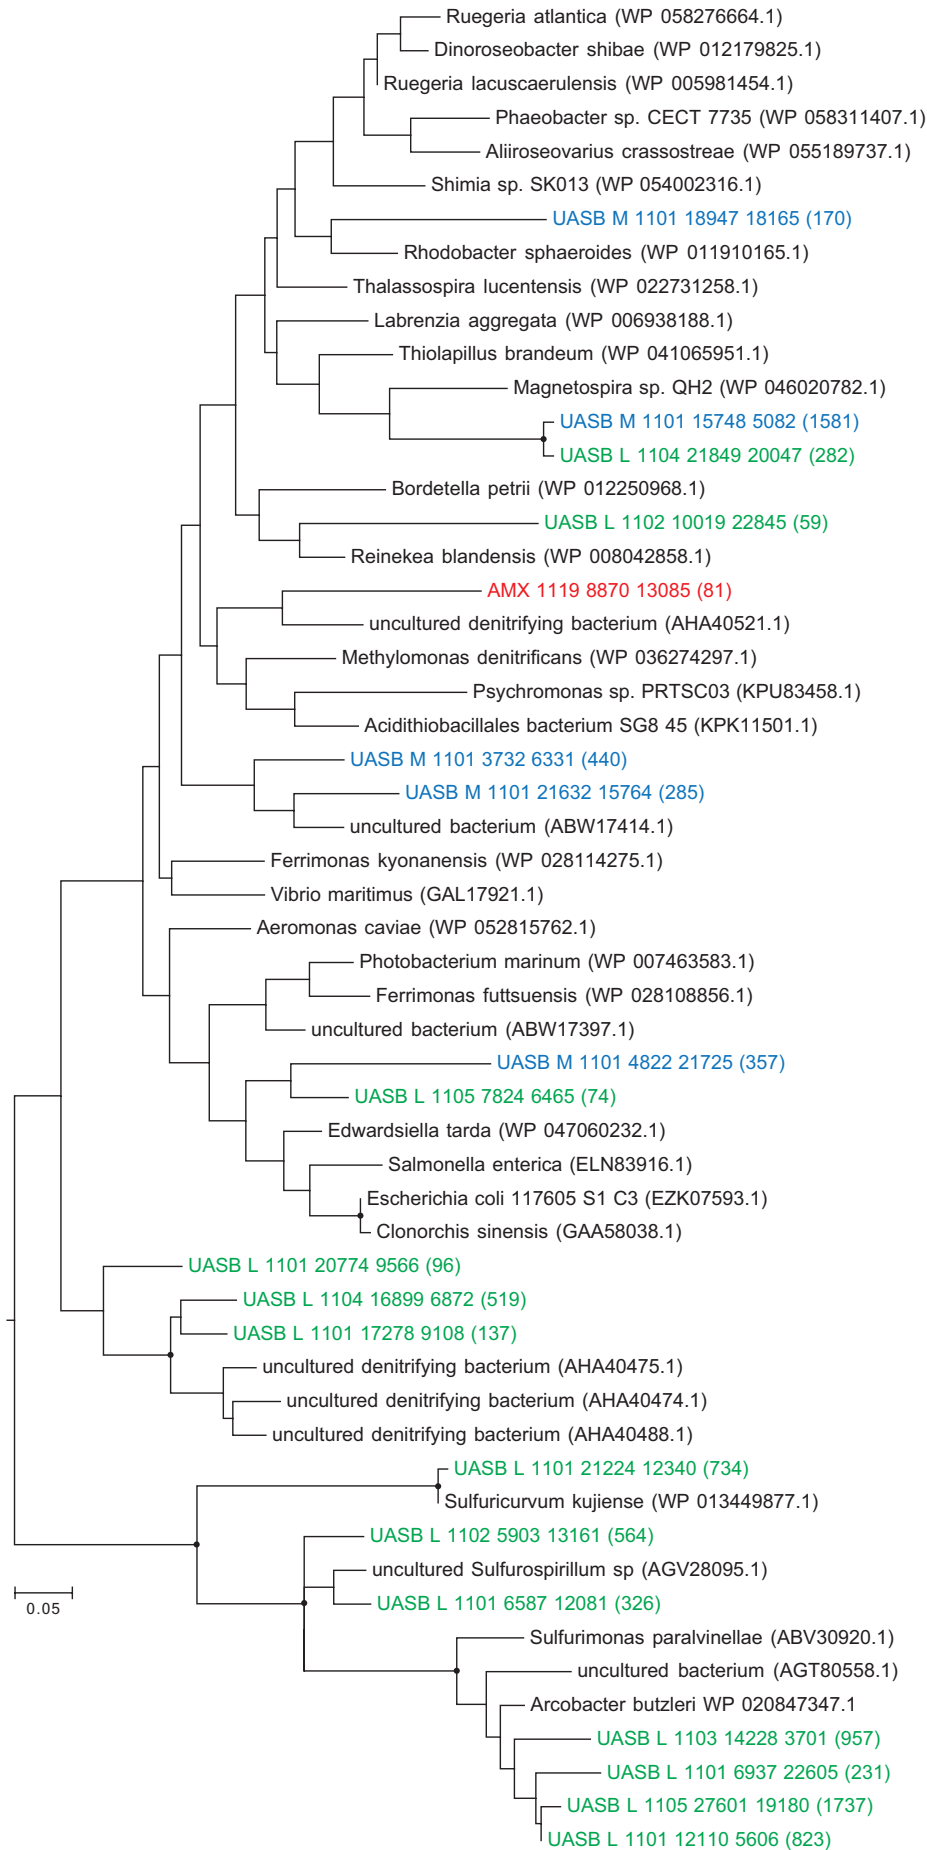

Figure S6. Maximum-likelihood tree showing the phylogenetic affiliation of the *napA* sequences obtained from UASB-M (blue) and UASB-L (green) samples. Operational taxonomic units (OTUs) determined based on 95% sequence similarity are shown. Numbers in parentheses indicate the number of sequence reads affiliated to the OTU. The scale bar represents 5% sequence divergence.

Table S1. Oligonucleotide primers used in this study.

| Target             | Forward primer |                         | Reverse primer |                          | Size*<br>(bp) | Ref.           |
|--------------------|----------------|-------------------------|----------------|--------------------------|---------------|----------------|
|                    | Name           | Sequence (5' - 3')      | Name           | Sequence (5' - 3')       |               |                |
| 16S rRNA gene      |                |                         |                |                          |               |                |
| Bacteria           | 341F           | CCTACGGGNGGCWGCAG       | 805R           | GACTACHVGGGTATCTAATCC    | 333           | 1              |
| Archaea            | Archaea-F KO   | CCCTAYGGGGYGCASCAGGC    | Archaea-R KO   | GCYCYCCCGCCAATTCMTTAA    | 554           | 2              |
| <i>amoA</i>        |                |                         |                |                          |               |                |
| AOB                | amoA_1F        | GGGGTTTCTACTGGTGGT      | amoA_2R        | CCCCTCKGSAAAGCCTTCTTC    | 490           | 3              |
|                    | amoA_F1        | GGGGHTTYTACTGGTGGT      | amoA_F1_R2     | TTTGATCCCCTCTGGAAACCCTTC | 490           | 3 <sup>†</sup> |
|                    | Gamo172 F1     | GGBGACTGGGAYTTCTGG      | Gamo172 F1_R1  | AAARCCCGAGAAGAAMGC       | 542           | This study     |
|                    | Gamo172 F1     | GGBGACTGGGAYTTCTGG      | Gamo172 F1_R2  | AAAACCCGCAAAAAGGC        | 542           | This study     |
|                    | Gamo172 F2     | TGGGATTTCTGGATGGAC      | Gamo172 F2_R1  | TGATACGAACGCAGAGAA       | 542           | This study     |
| AOA                | Arch-amoAF     | STAATGGTCTGGCTTAGACG    | Arch-amoAR     | GCGGCCATCCATCTGTATGT     | 649           | 4              |
|                    | Arch-amoAFA    | ACACCAGTTGGYTACCWTCDCG  | Arch-amoAR     | GCGGCCATCCATCTGTATGT     | 354           | 5              |
|                    | Arch-amoAFB    | CATCCRATGTGGATTCCATCDTG | Arch-amoAR     | GCGGCCATCCATCTGTATGT     | 354           | 5              |
|                    | Arch-amoA-for  | CTGAYTGGGTCYTGGACATC    | Arch-amoA-rev  | TTCTTCTTTGTGCCCAGTA      | 255           | 6              |
| <i>hao/hdh</i>     |                |                         |                |                          |               |                |
| Anammox            | hzocl1F1       | TGYAAGACYTG YCAYTGG     | hzocl1R2       | ACTCCAGATRTGCTGACC       | 470           | 7              |
| AOB                | haoF4          | AYCTKCGCTCRATGGG        | haoR2          | GGTTGGTYTTCTGKCCGG       | 738           | 8              |
| <i>hzs</i>         |                |                         |                |                          |               |                |
| Anammox            | hzsA_1597F     | WTYGGKTATCARTATGTAG     | hzsA1857R      | AAABGGYGAATCATARTGGC     | 263           | 9 <sup>†</sup> |
| <i>nxB</i>         |                |                         |                |                          |               |                |
| <i>Nitrobacter</i> | NxB 1F         | ACGTGGAGACCAAGCCGGG     | NxB 1R         | CCGTGCTGTTGAYCTCGTTGA    | 380           | 10             |
| <i>Nitrospira</i>  | nxB169f        | TACATGTGGTGAACA         | nxB638r        | CGGTTCTGGTCRATCA         | 485           | 11             |

| Target       | Forward primer |                           | Reverse primer |                          | Size*<br>(bp) | Ref.            |
|--------------|----------------|---------------------------|----------------|--------------------------|---------------|-----------------|
|              | Name           | Sequence (5' - 3')        | Name           | Sequence (5' - 3')       |               |                 |
| <i>narG</i>  |                |                           |                |                          |               |                 |
| Bacteria     | W9F            | MGNGGNTGYCCNMGNGGNGC      | T38R           | ACRTCNGTYTGYTCNCCCCA     | 500           | 12              |
|              | narG1960f      | AYGTSGGSCARGARAA          | narG2650r      | TYTCRTACCABGTBGC         | 650           | 13              |
| <i>nrfA</i>  |                |                           |                |                          |               |                 |
| DNRA         | nrfAF2aw       | CARTGYCAYGTBGARTA         | nrfAR1         | TWNGGCATRTGRCARTC        | 269           | 14              |
| <i>napA</i>  |                |                           |                |                          |               |                 |
| Bacteria     | V66            | TAYTTYTNHSNAARATHATGTAYGG | V67            | DATNGGRTGCATYTCNGCCATRTT | 400           | 15              |
|              | V17m           | TGGACVATGGGYTTYAAAYC      | napA4r         | ACYTCRCGHGCVGTRCCRCA     | 152           | 16              |
| <i>nirS</i>  |                |                           |                |                          |               |                 |
| Denitrifiers | nirSCd3aF      | AACGYSAAGGARACSGG         | nirSR3cd       | GASTTCGGRTGSGTCTTSAYGAA  | 339           | 17              |
| Anammox      | Scnir372F      | TGTRGCCAGYATTGTWGCCT      | Scnir845R      | TCAAGCCAGACCCATTTRCT     | 473           | 18 <sup>†</sup> |
| <i>nirK</i>  |                |                           |                |                          |               |                 |
| Denitrifiers | FlaCu          | ATCATGGTSC TGCCGCG        | R3Cu           | GCCTCGATCAGRTTGTGGTT     | 472           | 19              |
|              | nirK876        | ATYGGCGGVAYGGCGA          | nirK1040       | GCCTCGATCAGRTTGTGGTT     | 164           | 20              |
| AOB          | nirK_166F      | GTWCCSGGTCCGGTYGTRCG      | nirK_665R      | TCRTTGGGWCCRGCR TTGAC    | 499           | 21              |
| <i>norB</i>  |                |                           |                |                          |               |                 |
| Denitrifiers | norB2          | GACAARHWVTAYTGGTGGT       | norB6          | TGCAKSARRCCCCABACBCC     | 394           | 22              |
|              | cnorB-2F       | GACAAGNNNTACTGGTGGT       | cnorB-6R       | GAANCCCCANACNCCNGC       | 372           | 23              |
| Bacteria     | qnorB2F        | GGNCAYCARGGNTAYGA         | qnorB5R        | ACCCANAGRTGNACNACCCACCA  | 240           | 23              |
|              | qnorB2F        | GGNCAYCARGGNTAYGA         | qnorB7R        | GGNGGRTT DATCADGAANCC    | 618           | 23              |
| <i>nosZ</i>  |                |                           |                |                          |               |                 |
| Denitrifiers | nosZ1F         | WCSYTGTTTCMTGACAGCCAG     | nosZ1R         | ATGTCGATCARCTGVKCR TTYTC | 259           | 24              |
|              | nosZ-II-F      | CTIGGICCIYTKCAYAC         | nosZ-II-R      | GCIGARCARA AITCBGTRC     | 745           | 25              |



| Target                 | Forward primer |                                | Reverse primer |                            | Size*<br>(bp) | Ref. |
|------------------------|----------------|--------------------------------|----------------|----------------------------|---------------|------|
|                        | Name           | Sequence (5' - 3')             | Name           | Sequence (5' - 3')         |               |      |
| <i>nifH</i>            |                |                                |                |                            |               |      |
| N <sub>2</sub> -fixers | nifHF          | AAAGGYGGWATCGGYAARTCCACCAC     | nifHR          | TTGTTSGCSGCRTACATSGCCATCAT | 457           | 26   |
|                        | IGK3           | GCIWHTHTAYGGIAARGGIGGIATHGGIAA | DVV            | ATIGCRAAICCCRCRAIACIACRTC  | 394           | 27   |

\*Amplicon size without illumina tag sequences, sample-unique index and illumina adaptor (about 150 bp).

†Original sequence was modified to improve coverage.

## References.

1. Herlemann, D.P., Labrenz, M., Jürgens, K., Bertilsson, S., Waniek, J.J. and Andersson, A.F. (2011) Transitions in bacterial communities along the 2000 km salinity gradient of the Baltic Sea. *ISME J.* **5**, 1571-1579.
2. Murakami, S., Fujishima, K., Tomita, M. and Kanai, A. (2012) Metatranscriptomic analysis of microbes in an oceanfront deep-subsurface hot spring reveals novel small RNAs and type-specific tRNA degradation. *Appl. Environ. Microbiol.* **78**, 1015-1022.
3. Rotthauwe, J.H., Witzel, K.P. and Liesack, A.W. (1997) The ammonia monooxygenase structural gene *amoA* as a functional marker: molecular fine-scale analysis of natural ammonia-oxidizing populations. *Appl. Environ. Microbiol.* **63**, 4704-4712.
4. Francis, C.A., Roberts, K.J., Michael Beman, J., Santoro, A.E. and Oakley, B.B. (2005) Ubiquity and diversity of ammonia-oxidizing Archaea in water columns and sediments of the ocean. *Proc. Natl. Acad. Sci. U. S. A.* **102**, 14683-14688.
5. Beman, J.M., Popp, B.N. and Francis, C.A. (2008) Molecular and biogeochemical evidence for ammonia oxidation by marine Crenarchaeota in the Gulf of California. *ISME J.* **2**, 429-441.
6. Wuchter, C., Abbas, B., Coolen, M.J.L., Herfort, L., van Bleijswijk, J., Timmers, P., Strous, M., Teira, E., Herndl, G.J., Middelburg, J.J., Schouten, S. and Damsté, J.S.S. (2006) Archaea nitrification in the ocean. *Proc. Natl. Acad. Sci. USA.* **103**, 12317-12322.
7. Li, M., Hong, Y., Klotz, M.G. and Gu, J.-D. (2010) A comparison of primer sets for detecting 16S rRNA and hydrazine oxidoreductase genes of anaerobic ammonium-oxidizing bacteria in marine sediments. *Appl. Microbiol. Biotechnol.* **86**, 781-790.

8. Schmid, M.C., Hooper, A.B., Klotz, M.G., Woebken, D., Lam, P., Kuypers, M.M.M., Pommerening-Roeser, A., op den Camp, H.J.M. and Jetten, M.S.M. (2008) Environmental detection of octahaem cytochrome *c* hydroxylamine/hydrazine oxidoreductase genes of aerobic and anaerobic ammonium-oxidizing bacteria. *Environ. Microbiol.* **10**, 3140-3149.
9. Harhangi, H.R., Roy, M.L., van Alen, T., Hu, B.L., Groen, J., Kartal, B., Tringe, S.G., Quan, Z.X., Jetten, M.S.M. and Op den Camp, H.J.M. (2012) Hydrazine synthase, a unique phylomarker with which to study the presence and biodiversity of anammox bacteria. *Appl. Environ. Microbiol.* **78**, 752-758.
10. Vanparys, B., Spieck, E., Heylen, K., Wittebolle, L., Geets, J., Boon, N. and Vos, P.D. (2007) The phylogeny of the genus *Nitrobacter* based on comparative rep-PCR, 16S rRNA and nitrite oxidoreductase gene sequence analysis. *Syst. Appl. Microbiol.* **30**, 297-308.
11. Pester, M., Maixner, F., Berry, D., Rattei, T., Koch, H., Lückner, S., Nowka, B., Richter, A., Spieck, E., Lebedeva, E., Loy, A., Wagner, M. and Daims, H. (2014) NxrB encoding the beta subunit of nitrite oxidoreductase as functional and phylogenetic marker for nitrite-oxidizing *Nitrospira*. *Environ. Microbiol.* **16**, 3055-3071.
12. Gregory, L.G., Karakas-Sen, A., Richardson, D.J. and Spiro, S. (2000) Detection of genes for membrane-bound nitrate reductase in nitrate-respiring bacteria and in community DNA. *FEMS Microbiol. Lett.* **183**, 275-279.
13. Philippot, L., Piutti, S., Martin-Laurent, F., Hallet, S. and Germon, J.C. (2002) Molecular analysis of the nitrate-reducing community from unplanted and maize-planted soils. *Appl. Environ. Microbiol.* **68**, 6121-6128.
14. Welsh, A., Chee-Sanford, J.C., Connor, L.M., Löffler, F.E. and Sanford, R.A. (2014) Refined NrfA phylogeny improves PCR-based *nrfA* gene detection. *Appl. Environ. Microbiol.* **80**, 2110-2119.
15. Flanagan, D.A., Gregory, L.G., Carter, J.P., Karakas-Sen, A. and David J. Richardson, S. (1999) Detection of genes for periplasmic nitrate reductase in nitrate respiring bacteria and in community DNA. *FEMS Microbiol. Lett.* **177**, 263-270.
16. Bru, D., Sarr, A. and Philippot, L. (2007) Relative abundances of proteobacterial membrane-bound and periplasmic nitrate reductases in selected environments. *Appl. Environ. Microbiol.* **73**, 5971-5974.
17. Kandeler, E., Deiglmayr, K., Tscherko, D., Bru, D. and Philippot, L. (2006) Abundance of *narG*, *nirS*, *nirK*, and *nosZ* genes of denitrifying bacteria during primary successions of a glacier foreland. *Appl. Environ. Microbiol.* **72**, 5957-5962.
18. Lam, P., Lavik, G., Jensen, M.M., van de Vossenberg, J., Schmid, M., Woebken, D., Gutiérrez, D., Amann, R., Jetten, M.S., and Kuypers, M.M. 2009. Revising the nitrogen cycle in the Peruvian oxygen minimum zone. *Proc. Natl. Acad. Sci. USA.* **106**, 4752-4757.

19. Throbäck, I.N., Enwall, K., Jarvis, Å. and Hallin, S. (2004) Reassessing PCR primers targeting *nirS*, *nirK* and *nosZ* genes for community surveys of denitrifying bacteria with DGGE. *FEMS Microbiol. Ecol.* **49**, 401-417.
20. Henry S., Baudouin, E., López-Gutiérrez, J.C., Martin-Laurent, F., Brauman, A. and Philippot, L. (2004) Quantification of denitrifying bacteria in soils by *nirK* gene targeted real-time PCR. *J Microbiol Methods* **59**, 327-335. Corrigendum in *J. Microbiol. Methods* **61**: 289-290.
21. Cantera J.J.L and Stein L.Y. (2007). Molecular diversity of nitrite reductase genes (*nirK*) in nitrifying bacteria. *Environ. Microbiol.* **9**, 765-776.
22. Casciotti, K.L. and Ward, B.B. (2005) Phylogenetic analysis of nitric oxide reductase gene homologues from aerobic ammonia-oxidizing bacteria. *FEMS Microbiol. Ecol.* **52**, 197-205.
23. Braker, G. and Tiedje, J.M. (2003) Nitric oxide reductase (*norB*) genes from pure cultures and environmental samples. *Appl. Environ. Microbiol.* **69**, 3476-3483.
24. Henry, S., Bru, D., Stres, B., Hallet, S. and Philippot, L. (2006) Quantitative detection of the *nosZ* gene, encoding nitrous oxide reductase, and comparison of the abundances of 16S rRNA, *narG*, *nirK*, and *nosZ* genes in soils. *Appl. Environ. Microbiol.* **72**, 5181-5189.
25. Jones, C.M., Graf, D.R., Bru, D., Philippot, L. and Hallin, S. (2013) The unaccounted yet abundant nitrous oxide-reducing microbial community: a potential nitrous oxide sink. *ISME J.* **7**, 417-426.
26. Rösch, C., Mergel, A. and Bothe, H. (2002) Biodiversity of denitrifying and dinitrogen-fixing bacteria in an acid forest soil. *Appl. Environ. Microbiol.* **68**, 3818-3829.
27. Gaby, J.C. and Buckley, D.H. (2012) A comprehensive evaluation of PCR primers to amplify the *nifH* gene of nitrogenase. *PLoS One* **7**, e42149.

**Table S2.** Blastx results of the MiSeq sequence reads retrieved from pure bacterial strains and enrichment culture samples.

| Query               |                |                          | Highest Blastx Hit |          |                                           |                                        |              |
|---------------------|----------------|--------------------------|--------------------|----------|-------------------------------------------|----------------------------------------|--------------|
| Sample <sup>a</sup> | Gene           | Sequence ID <sup>b</sup> | E value            | Identity | Description                               | Organisms                              | Accession    |
| 1                   | <i>nxrB</i>    | AC602:1:1101:18190:4325  | 3.00E-82           | 98%      | Nitrite oxidoreductase                    | <i>Nitrobacter vulgaris</i>            | CAL09964.1   |
| 2                   | <i>nxrB</i>    | AC602:1:1106:22855:14231 | 5.00E-55           | 93%      | Nitrite oxidoreductase beta subunit       | <i>Ca. Nitrospira bockiana</i>         | AHA36496.1   |
| 3                   | <i>nxrB</i>    | AC602:1:1101:13350:6363  | 8.00E-104          | 100%     | Nitrate oxidoreductase subunit beta       | <i>Ca. Nitrospira defluvii</i>         | WP_013249748 |
| 4                   | <i>amoA</i>    | AC602:1:1101:20016:2363  | 6.00E-28           | 99%      | Ammonia monooxygenase, partial            | <i>Ca. Nitrosocosmicus franklandus</i> | AMH87091.1   |
| 4                   | <i>nirK</i>    | AC602:1:1101:20028:5606  | 9.00E-90           | 90%      | Nitrite reductase, copper-containing      | <i>Bradyrhizobium</i> sp. Ai1a-2       | WP_027578884 |
| 5                   | <i>hzs</i>     | AC602:1:1101:22101:3624  | 4.00E-41           | 97%      | Hydrazine synthase subunit A              | <i>Ca. Brocadia sinica</i>             | KXK32732.1   |
| 5                   | <i>hao/hdh</i> | AC602:1:1101:7970:2276   | 2.00E-94           | 97%      | Hydroxylamine oxidoreductase-like protein | <i>Ca. Brocadia sinica</i>             | KXK32736.1   |
| 5                   | <i>nxrB</i>    | AC602:1:1101:3318:11095  | 1.00E-88           | 99%      | Nitrate oxidoreductase subunit beta       | <i>Ca. Brocadia sinica</i>             | WP_052565644 |
| 5                   | <i>nrfA</i>    | AC602:1:1101:13715:2414  | 2.00E-38           | 100%     | Nitrite reductase                         | <i>Ca. Brocadia sinica</i>             | WP_052565197 |

<sup>a</sup>1, *Nitrobacter vulgaris*; 2, *Nitrospira japonica* J1; 3, *Nitrospira* sp. ND1; 4, Enrichment culture of ammonia-oxidizing archaeon; 5, Enrichment culture of “*Ca. Brocadia sinica*”

<sup>b</sup>Complete sequence ID comes after the instrument ID of “M01935:46:000000000-”.

**Table S3.** Proportions of sequence reads sorted to each target gene bin. Proportions of non-target sequences and the number of sequence reads for each sample are also shown.

| Sample                |                                                            | Total number of reads | Proportion of sequence reads (%) |            |             |             |             |             |             |             |            |            |             |             |               |            |
|-----------------------|------------------------------------------------------------|-----------------------|----------------------------------|------------|-------------|-------------|-------------|-------------|-------------|-------------|------------|------------|-------------|-------------|---------------|------------|
|                       |                                                            |                       | <i>narG</i>                      | <i>nxB</i> | <i>nirK</i> | <i>nirS</i> | <i>nifH</i> | <i>amoA</i> | <i>nrfA</i> | <i>napA</i> | <i>hzs</i> | <i>hao</i> | <i>nosZ</i> | <i>norB</i> | 16S rRNA gene | Non-target |
| AOB                   | <i>Nitrosomonas europaea</i>                               | 180,774               | 7.9                              | 3.6        | 6.4         | 7.2         | 8.8         | 13.6        | 2.9         | 2.4         | 0.0        | 0.5        | 14.7        | 5.7         | 1.5           | 24.9       |
| NOB                   | <i>Nitrobacter vulgaris</i>                                | 237,322               | 5.3                              | 11.0       | 10.2        | 3.2         | 6.6         | 0.6         | 0.4         | 5.9         | 0.0        | 0.0        | 31.9        | 14.4        | 6.5           | 4.1        |
|                       | <i>Nitrospira japonica</i> J1                              | 271,482               | 7.7                              | 9.6        | 2.3         | 8.2         | 4.8         | 1.2         | 3.2         | 4.6         | 0.0        | 0.0        | 16.7        | 9.1         | 6.0           | 26.6       |
|                       | <i>Nitrospira</i> sp. ND1                                  | 246,579               | 5.8                              | 10.0       | 12.9        | 3.5         | 3.4         | 3.0         | 10.6        | 7.4         | 0.0        | 0.0        | 1.3         | 10.9        | 9.3           | 22.1       |
| Denitrifier           | <i>Bradyrhizobium</i> sp. TSA1                             | 488,063               | 4.6                              | 5.0        | 9.6         | 6.9         | 2.3         | 2.5         | 0.7         | 17.5        | 0.0        | 0.0        | 18.9        | 15.1        | 6.3           | 10.5       |
|                       | <i>Cupriavidus necator</i> H16                             | 347,475               | 8.6                              | 3.6        | 4.9         | 8.0         | 2.6         | 1.5         | 2.0         | 27.0        | 0.0        | 0.0        | 19.5        | 15.1        | 0.0           | 7.2        |
|                       | <i>Noviherbaspirillum autotrophicum</i> TSA66 <sup>T</sup> | 461,991               | 6.8                              | 10.6       | 4.7         | 4.5         | 4.4         | 2.8         | 3.0         | 11.6        | 0.0        | 0.0        | 13.0        | 17.4        | 5.0           | 16.2       |
|                       | <i>Paracoccus denitrificans</i> JCM 21484 <sup>T</sup>     | 364,057               | 3.2                              | 3.8        | 1.6         | 6.9         | 5.8         | 0.1         | 2.5         | 24.6        | 0.0        | 0.0        | 23.0        | 12.5        | 7.0           | 9.0        |
|                       | <i>Pseudogulbenkiana</i> sp. 2002                          | 250,883               | 3.5                              | 12.5       | 8.0         | 19.3        | 1.7         | 1.3         | 0.3         | 1.8         | 0.0        | 0.2        | 13.4        | 17.4        | 9.5           | 11.1       |
|                       | <i>Pseudogulbenkiana</i> sp. NH8B                          | 317,279               | 6.8                              | 1.8        | 15.6        | 0.3         | 12.2        | 1.5         | 16.6        | 8.2         | 0.0        | 0.0        | 2.8         | 6.7         | 7.8           | 19.8       |
|                       | <i>Pseudomonas aeruginosa</i> PAO1                         | 176,670               | 4.9                              | 6.5        | 13.2        | 14.9        | 2.7         | 0.1         | 1.0         | 13.9        | 0.0        | 0.1        | 16.0        | 19.4        | 12.3          | 0.0        |
| DNRA                  | <i>Anaeromyxobacter dehalogenans</i> 2CP-C                 | 228,433               | 0.8                              | 0.4        | 0.9         | 0.2         | 5.7         | 0.0         | 37.7        | 6.2         | 0.0        | 0.0        | 0.7         | 29.9        | 16.4          | 1.1        |
|                       | <i>Campylobacter jejuni</i> JCM 2013                       | 200,681               | 0.3                              | 0.0        | 25.8        | 2.0         | 0.0         | 0.0         | 31.7        | 29.7        | 0.0        | 0.0        | 0.1         | 0.1         | 0.0           | 10.1       |
|                       | <i>Escherichia coli</i> K12                                | 341,214               | 5.7                              | 2.5        | 0.7         | 1.0         | 6.1         | 5.3         | 28.8        | 19.7        | 0.0        | 0.0        | 4.6         | 4.5         | 7.7           | 13.5       |
| N <sub>2</sub> -fixer | <i>Azospirillum brasilense</i> Sp7 <sup>T</sup>            | 86,227                | 8.1                              | 10.0       | 1.8         | 11.9        | 8.4         | 10.3        | 1.7         | 19.9        | 0.0        | 0.0        | 11.6        | 7.3         | 10.4          | 0.0        |
|                       | <i>Bradyrhizobium diazoefficiens</i> USDA110 <sup>T</sup>  | 401,541               | 8.0                              | 4.2        | 6.4         | 4.4         | 17.2        | 0.1         | 4.0         | 17.2        | 0.0        | 0.0        | 17.3        | 14.7        | 5.3           | 1.2        |
|                       | <i>Herbaspirillum seropedicae</i> JCM 21448 <sup>T</sup>   | 316,359               | 10.1                             | 1.4        | 1.6         | 8.0         | 15.0        | 5.4         | 9.8         | 4.6         | 0.0        | 0.0        | 9.4         | 14.9        | 2.9           | 17.2       |
| Anammox               | " <i>Ca. Brocadia sinica</i> "                             | 55,162                | 5.8                              | 9.2        | 3.9         | 4.3         | 1.5         | 4.6         | 13.2        | 7.0         | 7.0        | 10.5       | 7.9         | 4.8         | 4.7           | 15.8       |
| Environmental         | UASB-M                                                     | 531,131               | 5.7                              | 0.5        | 4.3         | 2.4         | 7.6         | 1.5         | 12.4        | 7.6         | 0.0        | 0.0        | 4.9         | 8.9         | 3.6           | 40.5       |
|                       | UASB-L                                                     | 661,458               | 4.7                              | 1.9        | 2.4         | 1.6         | 3.7         | 1.1         | 8.5         | 3.4         | 0.0        | 0.2        | 5.3         | 5.6         | 2.7           | 58.8       |

**Table S4.** Closest relatives of the operational taxonomic units (OTUs) identified from (a) UASB-L and (b) UASB-M samples. Demultiplexed sequence reads obtained by the NiCE chip-amplicon sequencing were assembled and then sorted to the N cycle functional gene bin by blastn. Reads in each bin were grouped into OTU based on sequence similarities at  $\geq 95\%$ . Relative abundance of each OTU in total sequence reads in the sample is also shown. Same data are used to generate Fig. 4.

a) UASB-L

| Gene        | OTU (accession number)                                      | Abundance | blast hit                                                                                                                          | e-value |
|-------------|-------------------------------------------------------------|-----------|------------------------------------------------------------------------------------------------------------------------------------|---------|
| <i>nxB</i>  | M01935:46:000000000-AC602:1:1101<br>:22605:9690 (LC256820)  | 8.2%      | nxB;AP012337;location.2281235..2282458.;Caldilinea.aerophila.DS<br>M.14535...NBRC.104270.definition.nitrate.reductase.beta.subunit | 2E-12   |
| <i>nxB</i>  | M01935:46:000000000-AC602:1:1103<br>:15164:3056 (LC230433)  | 1.1%      | nxB;AP012337;location.2281235..2282458.;Caldilinea.aerophila.D<br>SM.14535...NBRC.104270.definition.nitrate.reductase.beta.subunit | 1E-28   |
| <i>nirK</i> | M01935:46:000000000-AC602:1:1101<br>:27787:8721 (LC230434)  | 1.5%      | nirK;EU285337;location.<1.515.;uncultured.bacterium.definition.co<br>pper-containing.nitrite.reductase                             | 0       |
| <i>nirK</i> | M01935:46:000000000-AC602:1:1101<br>:18495:9284 (LC230435)  | 1.4%      | nirK;HM116353;location.<1.474.;uncultured.bacterium.definition.n<br>itrite.reductase                                               | 0       |
| <i>nirK</i> | M01935:46:000000000-AC602:1:1102<br>:10172:14390 (LC230436) | 0.78%     | nirK;AB162332;location.<1.515.;uncultured.bacterium.definition.ni<br>trite.reductase                                               | 0       |
| <i>nirK</i> | M01935:46:000000000-AC602:1:1101<br>:12816:19525 (LC230437) | 0.75%     | nirK;AB162937;location.<1.515.;uncultured.bacterium.definition.ni<br>trite.reductase                                               | 0       |
| <i>nirK</i> | M01935:46:000000000-AC602:1:1102<br>:28478:14751 (LC230438) | 0.50%     | nirK;HQ916682;location.<1.360.;uncultured.bacterium.definition.N<br>irK                                                            | 3E-162  |
| <i>nirK</i> | M01935:46:000000000-AC602:1:1102<br>:19553:20134 (LC256821) | 0.36%     | nirK;DQ182205;location.<1.473.;uncultured.bacterium.definition.p<br>utative.nitrite.reductase                                      | 1E-81   |

| Gene        | OTU (accession number)                                      | Abundance | blast hit                                                                                                       | e-value |
|-------------|-------------------------------------------------------------|-----------|-----------------------------------------------------------------------------------------------------------------|---------|
| <i>nirK</i> | M01935:46:000000000-AC602:1:1102<br>:11590:5036 (LC230439)  | 0.30%     | nirK;AB453443;location.<1.436.;uncultured.bacterium.definition.nitrite.reductase                                | 0       |
| <i>nirK</i> | M01935:46:000000000-AC602:1:1105<br>:7370:19214 (LC230440)  | 0.25%     | nirK;FJ204572;location.<1.541.;uncultured.bacterium.definition.nitrite.reductase                                | 2E-123  |
| <i>nirK</i> | M01935:46:000000000-AC602:1:1103<br>:6449:23430 (LC230441)  | 0.19%     | nirK;DQ304337;location.<1.473.;uncultured.bacterium.definition.partial.nitrite.reductase                        | 9E-73   |
| <i>nirK</i> | M01935:46:000000000-AC602:1:1105<br>:12008:13301 (LC230442) | 0.17%     | nirK;FR774851;location.<1.515.;uncultured.bacterium.definition.nitrite.reductase                                | 2E-135  |
| <i>nirS</i> | M01935:46:000000000-AC602:1:1101<br>:23782:4351 (LC230443)  | 0.82%     | nirS;AB773624;location.<1.>nirS;374.;uncultured.bacterium.definition.nitrite.reductase                          | 2E-52   |
| <i>nirS</i> | M01935:46:000000000-AC602:1:1104<br>:10868:20080 (LC230444) | 0.29%     | nirS;FR865832;location.<1.>nirS;408.;uncultured.bacterium.definition.cd1-containing.nitrite.reductase           | 2E-48   |
| <i>nirS</i> | M01935:46:000000000-AC602:1:1104<br>:13414:18089 (LC230445) | 0.22%     | nirS;HM438818;location.<1.>nirS;873.;uncultured.organism.definition.cytochrome.cd1-containing.nitrite.reductase | 2E-60   |
| <i>nirS</i> | M01935:46:000000000-AC602:1:1101<br>:19733:14440 (LC230446) | 0.21%     | nirS;JQ582714;location.<1.>nirS;337.;Zoogloea.sp..AR30.definition.cytochrome.cd1.nitrite.reductase              | 4E-148  |
| <i>nirS</i> | M01935:46:000000000-AC602:1:1101<br>:14366:22991 (LC230447) | 0.098%    | nirS;GQ443950;location.<1.>nirS;402.;uncultured.bacterium.definition.nitrite.reductase                          | 2E-106  |
| <i>nirS</i> | M01935:46:000000000-AC602:1:1103<br>:22874:4209 (LC230448)  | 0.096%    | nirS;DQ337877;location.<1.>nirS;425.;uncultured.bacterium.definition.NirS                                       | 4E-68   |

| Gene        | OTU (accession number)                                      | Abundance | blast hit                                                                                                                           | e-value |
|-------------|-------------------------------------------------------------|-----------|-------------------------------------------------------------------------------------------------------------------------------------|---------|
| <i>nifH</i> | M01935:46:000000000-AC602:1:1101<br>:11096:3130 (LC230449)  | 8.8%      | nifH;EF568543;location.<1..>nifH;354.;uncultured.microorganism.<br>definition.dinitrogenase.reductase                               | 2E-141  |
| <i>nifH</i> | M01935:46:000000000-AC602:1:1101<br>:18029:9821 (LC230450)  | 2.5%      | nifH;FN555079;location.<1..>nifH;327.;uncultured.bacterium.defin<br>ition.dinitrogenase.reductase                                   | 2E-58   |
| <i>nifH</i> | M01935:46:000000000-AC602:1:1102<br>:13016:18880 (LC230451) | 2.2%      | nifH;EF568543;location.<1..>nifH;354.;uncultured.microorganism.<br>definition.dinitrogenase.reductase                               | 0       |
| <i>nifH</i> | M01935:46:000000000-AC602:1:1101<br>:17130:6351 (LC230452)  | 2.0%      | nifH;X56071;location.132..959.;Methanobacterium.ivanovii.definiti<br>on.nitrogenase.Mo-Fe.protein                                   | 2E-57   |
| <i>nifH</i> | M01935:46:000000000-AC602:1:1102<br>:8944:16895 (LC230453)  | 1.8%      | nifH;DQ098182;location.<1..>nifH;353.;uncultured.nitrogen-fixing.<br>bacterium.definition.dinitrogenase.reductase                   | 8E-101  |
| <i>nifH</i> | M01935:46:000000000-AC602:1:1101<br>:10394:10702 (LC230454) | 1.1%      | nifH;FN555079;location.<1..>nifH;327.;uncultured.bacterium.defin<br>ition.dinitrogenase.reductase                                   | 8E-64   |
| <i>nifH</i> | M01935:46:000000000-AC602:1:1104<br>:21476:7972 (LC230455)  | 0.93%     | nifH;CP000867;location.complement(1694838..1695665).;Methano<br>coccus.maripaludis.C6.definition.nitrogenase.iron.protein           | 5E-28   |
| <i>nifH</i> | M01935:46:000000000-AC602:1:1102<br>:5023:6155 (LC230456)   | 0.91%     | nifH;FN555078;location.<1..>nifH;327.;uncultured.bacterium.defin<br>ition.dinitrogenase.reductase                                   | 5E-56   |
| <i>nifH</i> | M01935:46:000000000-AC602:1:1101<br>:23327:12451 (LC230457) | 0.69%     | nifH;CP002364;location.3518933..3519760.;Desulfobulbus.propion<br>icus.DSM.2032.definition.Mo-nitrogenase.iron.protein.subunit.NifH | 1E-99   |
| <i>nifH</i> | M01935:46:000000000-AC602:1:1104<br>:24367:13453 (LC230458) | 0.68%     | nifH;AY601051;location.<1..>nifH;461.;uncultured.bacterium.defin<br>ition.dinitrogenase.reductase                                   | 6E-117  |
| <i>nifH</i> | M01935:46:000000000-AC602:1:1102                            | 0.68%     | nifH;HQ660907;location.<1..>nifH;328.;uncultured.bacterium.defin                                                                    | 4E-161  |



| Gene        | OTU (accession number)                                      | Abundance | blast hit                                                                                                                           | e-value |
|-------------|-------------------------------------------------------------|-----------|-------------------------------------------------------------------------------------------------------------------------------------|---------|
|             | :2354:9239 (LC230459)                                       |           | ition.dinitrogenase.reductase                                                                                                       |         |
| <i>nifH</i> | M01935:46:000000000-AC602:1:1102<br>:23670:13173 (LC230460) | 0.63%     | nifH;EF196648;location.<1..>nifH;362.;uncultured.nitrogen-fixing.<br>bacterium.definition.dinitrogenase.reductase                   | 2E-27   |
| <i>nifH</i> | M01935:46:000000000-AC602:1:1101<br>:7783:6564 (LC230461)   | 0.62%     | nifH;CP002431;location.1151267..1152094.;Desulfovibrio.aespoee<br>nsis.Aspo-2.definition.nitrogenase.iron.protein                   | 3E-143  |
| <i>nifH</i> | M01935:46:000000000-AC602:1:1102<br>:5999:6644 (LC230462)   | 0.60%     | nifH;CP002364;location.3518933..3519760.;Desulfobulbus.propion<br>icus.DSM.2032.definition.Mo-nitrogenase.iron.protein.subunit.NifH | 4E-81   |
| <i>nifH</i> | M01935:46:000000000-AC602:1:1102<br>:21044:13271 (LC230463) | 0.46%     | nifH;HM219783;location.<1..>nifH;328.;uncultured.bacterium.defi<br>nition.dinitrogenase.reductase                                   | 6E-40   |
| <i>nifH</i> | M01935:46:000000000-AC602:1:1101<br>:5629:16024 (LC230464)  | 0.46%     | nifH;AY224038;location.<1..>nifH;324.;uncultured.bacterium.defin<br>ition.dinitrogenase.reductase.Fe.protein                        | 8E-29   |
| <i>nifH</i> | M01935:46:000000000-AC602:1:1105<br>:4859:5049 (LC230465)   | 0.39%     | nifH;GU193915;location.<1..>nifH;359.;uncultured.bacterium.defin<br>ition.nitrogenase                                               | 6E-80   |
| <i>nifH</i> | M01935:46:000000000-AC602:1:1101<br>:24515:14412 (LC230466) | 0.35%     | nifH;AB184945;location.<1..>nifH;387.;uncultured.bacterium.defin<br>ition.dinitrogenase.reductase                                   | 1E-24   |
| <i>nifH</i> | M01935:46:000000000-AC602:1:1102<br>:15834:18201 (LC230467) | 0.33%     | nifH;CP002403;location.complement(2743508..2744365).;Ruminoc<br>occus.albus.7.definition.nitrogenase.iron.protein                   | 3E-23   |
| <i>nifH</i> | M01935:46:000000000-AC602:1:1101<br>:22111:21111 (LC230468) | 0.30%     | nifH;EU915064;location.<1..>nifH;360.;uncultured.Antarctic.bacter<br>ium.definition.dinitrogenase.reductase                         | 2E-132  |
| <i>nifH</i> | M01935:46:000000000-AC602:1:1101<br>:17189:13933 (LC230469) | 0.28%     | nifH;EU915064;location.<1..>nifH;360.;uncultured.Antarctic.bacter<br>ium.definition.dinitrogenase.reductase                         | 3E-125  |

| Gene        | OTU (accession number)                                      | Abundance | blast hit                                                                                                     | e-value |
|-------------|-------------------------------------------------------------|-----------|---------------------------------------------------------------------------------------------------------------|---------|
| <i>nifH</i> | M01935:46:000000000-AC602:1:1102<br>:19122:13292 (LC230470) | 0.28%     | nifH;AJ313259;location.<1..>nifH;333.;uncultured.bacterium.definition.nitrogenase.Fe.protein                  | 3E-57   |
| <i>nifH</i> | M01935:46:000000000-AC602:1:1101<br>:23350:5390 (LC230471)  | 0.27%     | nifH;GQ289580;location.complement(<1..>nifH;461).;Bradyrhizobium.japonicum.definition.NifH                    | 2E-101  |
| <i>nifH</i> | M01935:46:000000000-AC602:1:1104<br>:7521:19451 (LC230472)  | 0.26%     | nifH;AM746581;location.<1..>nifH;322.;uncultured.bacterium.definition.dinitrogenase.reductase                 | 2E-17   |
| <i>nifH</i> | M01935:46:000000000-AC602:1:1105<br>:8922:3607 (LC230473)   | 0.26%     | nifH;HQ455837;location.<1..>nifH;398.;uncultured.marine.bacterium.definition.dinitrogenase.reductase          | 2E-150  |
| <i>nifH</i> | M01935:46:000000000-AC602:1:1105<br>:17006:11895 (LC230474) | 0.25%     | nifH;AY137237;location.<1..>nifH;327.;uncultured.bacterium.definition.dinitrogenase.reductase                 | 4E-41   |
| <i>nifH</i> | M01935:46:000000000-AC602:1:1101<br>:22955:22730 (LC230475) | 0.23%     | nifH;AY231492;location.<1..>nifH;324.;uncultured.nitrogen-fixing.bacterium.definition.dinitrogenase.reductase | 3E-53   |
| <i>nifH</i> | M01935:46:000000000-AC602:1:1103<br>:12212:2141 (LC230476)  | 0.21%     | nifH;GQ289569;location.complement(<1..>nifH;458).;Bradyrhizobium.japonicum.definition.NifH                    | 2E-33   |
| <i>nifH</i> | M01935:46:000000000-AC602:1:1104<br>:6597:5389 (LC230477)   | 0.20%     | nifH;HM852967;location.<1..>nifH;409.;uncultured.bacterium.definition.dinitrogenase.iron.protein              | 1E-160  |
| <i>nifH</i> | M01935:46:000000000-AC602:1:1102<br>:6943:21922 (LC230478)  | 0.18%     | nifH;U97118;location.<1..>nifH;411.;Azoarcus.indigens.definition.nitrogenase.iron.protein                     | 1E-133  |
| <i>nifH</i> | M01935:46:000000000-AC602:1:1103<br>:8360:13788 (LC230479)  | 0.15%     | nifH;HQ190142;location.<1..>nifH;426.;uncultured.bacterium.definition.nitrogenase.component.II                | 6E-120  |

| Gene        | OTU (accession number)                                      | Abundance | blast hit                                                                                                                           | e-value |
|-------------|-------------------------------------------------------------|-----------|-------------------------------------------------------------------------------------------------------------------------------------|---------|
| <i>nifH</i> | M01935:46:000000000-AC602:1:1103<br>:18469:9644 (LC230480)  | 0.14%     | nifH;DQ402888;location.<1..>nifH;417.;uncultured.nitrogen-fixing.<br>bacterium.definition.dinitrogenase.reductase                   | 9E-42   |
| <i>nifH</i> | M01935:46:000000000-AC602:1:1103<br>:7224:2641 (LC230481)   | 0.14%     | nifH;CP000142;location.2447668..2448546.;Pelobacter.carbinolicus<br>.DSM.2380.definition.nitrogenase.iron.protein                   | 6E-157  |
| <i>nifH</i> | M01935:46:000000000-AC602:1:1104<br>:5921:9845 (LC230482)   | 0.12%     | nifH;CP002364;location.3518933..3519760.;Desulfobulbus.propion<br>icus.DSM.2032.definition.Mo-nitrogenase.iron.protein.subunit.NifH | 3E-109  |
| <i>nifH</i> | M01935:46:000000000-AC602:1:1101<br>:25220:21511 (LC230483) | 0.11%     | nifH;EF568543;location.<1..>nifH;354.;uncultured.microorganism.<br>definition.dinitrogenase.reductase                               | 1E-167  |
| <i>nifH</i> | M01935:46:000000000-AC602:1:1101<br>:26170:13988 (LC230484) | 0.093%    | nifH;JN162497;location.<1..>nifH;381.;uncultured.bacterium.defini<br>tion.dinitrogenase.reductase                                   | 2E-49   |
| <i>nifH</i> | M01935:46:000000000-AC602:1:1105<br>:18771:7742 (LC230485)  | 0.088%    | nifH;HM113557;location.<1..>nifH;324.;uncultured.organism.defin<br>ition.NifH                                                       | 3E-48   |
| <i>nifH</i> | M01935:46:000000000-AC602:1:1101<br>:6052:12655 (LC230486)  | 0.086%    | nifH;DQ098176;location.<1..>nifH;354.;uncultured.nitrogen-fixing.<br>bacterium.definition.dinitrogenase.reductase                   | 2E-79   |
| <i>nifH</i> | M01935:46:000000000-AC602:1:1102<br>:24868:6561 (LC230487)  | 0.086%    | nifH;X56071;location.132..959.;Methanobacterium.ivanovii.definiti<br>on.nitrogenase.Mo-Fe.protein                                   | 8E-63   |
| <i>nifH</i> | M01935:46:000000000-AC602:1:1105<br>:11023:5059 (LC230488)  | 0.084%    | nifH;HQ455838;location.<1..>nifH;362.;uncultured.marine.bacteriu<br>m.definition.dinitrogenase.reductase                            | 3E-28   |
| <i>nifH</i> | M01935:46:000000000-AC602:1:1101<br>:23311:23824 (LC230489) | 0.074%    | nifH;HQ455838;location.<1..>nifH;362.;uncultured.marine.bacteriu<br>m.definition.dinitrogenase.reductase                            | 1E-34   |

| Gene        | OTU (accession number)                                      | Abundance | blast hit                                                                                                                           | e-value |
|-------------|-------------------------------------------------------------|-----------|-------------------------------------------------------------------------------------------------------------------------------------|---------|
| <i>nifH</i> | M01935:46:000000000-AC602:1:1103<br>:18699:11981 (LC230490) | 0.062%    | nifH;CP002364;location.3518933..3519760.;Desulfobulbus.propion<br>icus.DSM.2032.definition.Mo-nitrogenase.iron.protein.subunit.NifH | 6E-117  |
| <i>nifH</i> | M01935:46:000000000-AC602:1:1105<br>:12116:13177 (LC230491) | 0.060%    | nifH;HQ605987;location.<1..>nifH;360.;uncultured.organism.defini<br>tion.nitrogenase                                                | 6E-33   |
| <i>nifH</i> | M01935:46:000000000-AC602:1:1103<br>:10865:14544 (LC230492) | 0.055%    | nifH;EF208185;location.<1..>nifH;366.;uncultured.nitrogen-fixing.<br>bacterium.definition.dinitrogenase.reductase                   | 3E-118  |
| <i>nifH</i> | M01935:46:000000000-AC602:1:1101<br>:13391:23414 (LC230493) | 0.053%    | nifH;EU915064;location.<1..>nifH;360.;uncultured.Antarctic.bacter<br>ium.definition.dinitrogenase.reductase                         | 1E-127  |
| <i>nifH</i> | M01935:46:000000000-AC602:1:1103<br>:16207:22916 (LC230494) | 0.053%    | nifH;HQ455838;location.<1..>nifH;362.;uncultured.marine.bacteriu<br>m.definition.dinitrogenase.reductase                            | 4E-37   |
| <i>nifH</i> | M01935:46:000000000-AC602:1:1101<br>:8663:8116 (LC230495)   | 0.043%    | nifH;GQ452751;location.<1..>nifH;389.;uncultured.microorganism.<br>definition.NifH                                                  | 1E-33   |
| <i>nifH</i> | M01935:46:000000000-AC602:1:1105<br>:15257:19300 (LC230496) | 0.041%    | nifH;EU978418;location.<1..>nifH;368.;uncultured.microorganism.<br>definition.NifH                                                  | 5E-173  |
| <i>nifH</i> | M01935:46:000000000-AC602:1:1101<br>:3430:9045 (LC230497)   | 0.038%    | nifH;AY224045;location.<1..>nifH;318.;uncultured.bacterium.defin<br>ition.dinitrogenase.reductase.Fe.protein                        | 1E-129  |
| <i>nifH</i> | M01935:46:000000000-AC602:1:1105<br>:18096:13479 (LC230498) | 0.036%    | nifH;HQ010120;location.<1..>nifH;383.;uncultured.bacterium.defin<br>ition.dinitrogenase.reductase                                   | 3E-47   |
| <i>nifH</i> | M01935:46:000000000-AC602:1:1102<br>:12994:16340 (LC230499) | 0.026%    | nifH;HQ190142;location.<1..>nifH;426.;uncultured.bacterium.defin<br>ition.nitrogenase.component.II                                  | 2E-76   |
| <i>nifH</i> | M01935:46:000000000-AC602:1:1105                            | 0.024%    | nifH;AY221783;location.<1..>nifH;327.;uncultured.bacterium.defin                                                                    | 2E-30   |

| Gene        | OTU (accession number)                                      | Abundance | blast hit                                                                                                                           | e-value |
|-------------|-------------------------------------------------------------|-----------|-------------------------------------------------------------------------------------------------------------------------------------|---------|
|             | :15667:18766 (LC230500)                                     |           | ition.dinitrogenase.reductase                                                                                                       |         |
| <i>nifH</i> | M01935:46:000000000-AC602:1:1103<br>:7208:10246 (LC230501)  | 0.022%    | nifH;CP002364;location.3518933..3519760.;Desulfobulbus.propion<br>icus.DSM.2032.definition.Mo-nitrogenase.iron.protein.subunit.NifH | 5E-136  |
| <i>nifH</i> | M01935:46:000000000-AC602:1:1105<br>:19141:8859 (LC230502)  | 0.022%    | nifH;HQ660907;location.<1..>nifH;328.;uncultured.bacterium.defin<br>ition.dinitrogenase.reductase                                   | 9E-113  |
| <i>nifH</i> | M01935:46:000000000-AC602:1:1103<br>:7423:18121 (LC230503)  | 0.019%    | nifH;GQ289566;location.complement(<1..>nifH;461).;Bradyrhizobi<br>um.japonicum.definition.NifH                                      | 1E-62   |
| <i>nifH</i> | M01935:46:000000000-AC602:1:1103<br>:12593:19020 (LC230504) | 0.019%    | nifH;AY787557;location.<1..>nifH;362.;uncultured.bacterium.defin<br>ition.nitrogenase.iron.protein                                  | 9E-113  |
| <i>nifH</i> | M01935:46:000000000-AC602:1:1103<br>:10270:23798 (LC230505) | 0.017%    | nifH;CP002364;location.3518933..3519760.;Desulfobulbus.propion<br>icus.DSM.2032.definition.Mo-nitrogenase.iron.protein.subunit.NifH | 2E-107  |
| <i>nifH</i> | M01935:46:000000000-AC602:1:1103<br>:3174:9055 (LC256822)   | 0.014%    | nifH;AF325795;location.<1..>nifH;430.;Spirochaeta.zuelzeriae.defin<br>ition.dinitrogenase.reductase                                 | 5E-34   |
| <i>nifH</i> | M01935:46:000000000-AC602:1:1101<br>:22085:20046 (LC230506) | 0.012%    | nifH;EU915064;location.<1..>nifH;360.;uncultured.Antarctic.bacter<br>ium.definition.dinitrogenase.reductase                         | 5E-108  |
| <i>nifH</i> | M01935:46:000000000-AC602:1:1102<br>:10683:3544 (LC230507)  | 0.010%    | nifH;HQ190142;location.<1..>nifH;426.;uncultured.bacterium.defin<br>ition.nitrogenase.component.II                                  | 1E-102  |
| <i>nifH</i> | M01935:46:000000000-AC602:1:1102<br>:17995:11039 (LC230508) | 0.010%    | nifH;AEXQ01000094;location.2098..2847.;Turicibacter.sp..HGF1.d<br>efinition.putative.nitrogenase.iron.protein                       | 5E-24   |
| <i>nifH</i> | M01935:46:000000000-AC602:1:1102<br>:15573:13629 (LC230509) | 0.007%    | nifH;FN555078;location.<1..>nifH;327.;uncultured.bacterium.defin<br>ition.dinitrogenase.reductase                                   | 2E-55   |

| Gene        | OTU (accession number)                                      | Abundance | blast hit                                                                                                                  | e-value |
|-------------|-------------------------------------------------------------|-----------|----------------------------------------------------------------------------------------------------------------------------|---------|
| <i>nifH</i> | M01935:46:000000000-AC602:1:1104<br>:13324:21448 (LC230510) | 0.007%    | nifH;CP002431;location.1151267..1152094.;Desulfovibrio.aespoeensis.Aspo-2.definition.nitrogenase.iron.protein              | 6E-111  |
| <i>nifH</i> | M01935:46:000000000-AC602:1:1104<br>:18604:4894 (LC230511)  | 0.007%    | nifH;EF626685;location.<1..>nifH;338.;Azonexus.hydrophilus.definition.dinitrogenase.reductase.subunit                      | 7E-95   |
| <i>nifH</i> | M01935:46:000000000-AC602:1:1104<br>:27401:10065 (LC230512) | 0.005%    | nifH;GQ289580;location.complement(<1..>nifH;461).;Bradyrhizobium.japonicum.definition.NifH                                 | 2E-95   |
| <i>nifH</i> | M01935:46:000000000-AC602:1:1103<br>:14080:19047 (LC230513) | 0.005%    | nifH;CP002364;location.3518933..3519760.;Desulfohalobium.sp.2032.definition.Mo-nitrogenase.iron.protein.subunit.NifH       | 9E-110  |
| <i>nifH</i> | M01935:46:000000000-AC602:1:1105<br>:18166:17719 (LC230514) | 0.005%    | nifH;CP003220;location.complement(1437333..1438160).;Desulfovibrio.desulfuricans.ND132.definition.nitrogenase.iron.protein | 6E-86   |
| <i>nifH</i> | M01935:46:000000000-AC602:1:1102<br>:16976:12646 (LC230515) | 0.005%    | nifH;EU693408;location.<1..>nifH;379.;uncultured.bacterium.definition.NifH                                                 | 1E-74   |
| <i>nifH</i> | M01935:46:000000000-AC602:1:1102<br>:10312:3339 (LC230516)  | 0.005%    | nifH;DQ098166;location.<1..>nifH;362.;uncultured.nitrogen-fixing.bacterium.definition.dinitrogenase.reductase              | 8E-104  |
| <i>nifH</i> | M01935:46:000000000-AC602:1:1103<br>:12047:5532 (LC230517)  | 0.005%    | nifH;CP002431;location.1151267..1152094.;Desulfovibrio.aespoeensis.Aspo-2.definition.nitrogenase.iron.protein              | 5E-68   |
| <i>nifH</i> | M01935:46:000000000-AC602:1:1101<br>:11265:19548 (LC230518) | 0.005%    | nifH;DQ078018;location.<1..>nifH;362.;uncultured.bacterium.definition.NifH                                                 | 3E-48   |
| <i>nifH</i> | M01935:46:000000000-AC602:1:1105<br>:4161:11000 (LC230519)  | 0.002%    | nifH;AP012320;location.4587848..4588729.;Rubrivivax.gelatinosus.IL144.definition.nitrogenase.iron.protein.NifH             | 5E-105  |

| Gene        | OTU (accession number)                                      | Abundance | blast hit                                                                                                                  | e-value |
|-------------|-------------------------------------------------------------|-----------|----------------------------------------------------------------------------------------------------------------------------|---------|
| <i>nifH</i> | M01935:46:000000000-AC602:1:1105<br>:15134:11708 (LC230520) | 0.002%    | nifH;CP003220;location.complement(1437333..1438160).;Desulfovibrio.desulfuricans.ND132.definition.nitrogenase.iron.protein | 9E-110  |
| <i>nifH</i> | M01935:46:000000000-AC602:1:1104<br>:25188:6207 (LC230521)  | 0.002%    | nifH;CP003220;location.complement(1437333..1438160).;Desulfovibrio.desulfuricans.ND132.definition.nitrogenase.iron.protein | 1E-90   |
| <i>nifH</i> | M01935:46:000000000-AC602:1:1103<br>:8230:24325 (LC230522)  | 0.002%    | nifH;DQ402833;location.<1..>nifH;417.;uncultured.nitrogen-fixing.bacterium.definition.dinitrogenase.reductase              | 4E-53   |
| <i>nifH</i> | M01935:46:000000000-AC602:1:1102<br>:2101:15056 (LC256823)  | 0.002%    | nifH;EF568543;location.<1..>nifH;354.;uncultured.microorganism.definition.dinitrogenase.reductase                          | 2E-107  |
| <i>nifH</i> | M01935:46:000000000-AC602:1:1102<br>:17994:10710 (LC230523) | 0.002%    | nifH;EF568543;location.<1..>nifH;354.;uncultured.microorganism.definition.dinitrogenase.reductase                          | 2E-79   |
| <i>nifH</i> | M01935:46:000000000-AC602:1:1104<br>:13381:16038 (LC230524) | 0.002%    | nifH;CP002431;location.1151267..1152094.;Desulfovibrio.aespoeensis.Aspo-2.definition.nitrogenase.iron.protein              | 4E-115  |
| <i>nifH</i> | M01935:46:000000000-AC602:1:1104<br>:18612:16660 (LC230525) | 0.002%    | nifH;DQ480966;location.<1..>nifH;329.;uncultured.bacterium.definition.dinitrogenase.reductase                              | 2E-70   |
| <i>nifH</i> | M01935:46:000000000-AC602:1:1104<br>:8719:11883 (LC230526)  | 0.002%    | nifH;DQ098182;location.<1..>nifH;353.;uncultured.nitrogen-fixing.bacterium.definition.dinitrogenase.reductase              | 9E-73   |
| <i>nifH</i> | M01935:46:000000000-AC602:1:1101<br>:20348:21323 (LC230527) | 0.002%    | nifH;DQ520543;location.<1..>nifH;361.;uncultured.bacterium.definition.nitrogenase.iron.protein                             | 6E-74   |
| <i>nifH</i> | M01935:46:000000000-AC602:1:1102<br>:21633:7759 (LC230528)  | 0.002%    | nifH;CP002431;location.1151267..1152094.;Desulfovibrio.aespoeensis.Aspo-2.definition.nitrogenase.iron.protein              | 2E-83   |

| Gene        | OTU (accession number)                                      | Abundance | blast hit                                                                                                             | e-value |
|-------------|-------------------------------------------------------------|-----------|-----------------------------------------------------------------------------------------------------------------------|---------|
| <i>nifH</i> | M01935:46:000000000-AC602:1:1101<br>:25728:10177 (LC230529) | 0.002%    | nifH;EF568543;location.<1..>nifH;354.;uncultured.microorganism.<br>definition.dinitrogenase.reductase                 | 7E-95   |
| <i>nrfA</i> | M01935:46:000000000-AC602:1:1104<br>:14081:15521 (LC230530) | 1.1%      | nrfA_Welsh;AJ697846;location.<1..>nrfA_Welsh;487.;uncultured.b<br>acterium.definition.cytochrome.c.nitrite.reductase  | 1E-20   |
| <i>nrfA</i> | M01935:46:000000000-AC602:1:1101<br>:4384:20473 (LC256824)  | 1.03%     | nrfA_Welsh;AMFJ01033964;location.30683..32173.;uncultured.bac<br>terium.definition.hypothetical.protein               | 2E-22   |
| <i>nrfA</i> | M01935:46:000000000-AC602:1:1101<br>:19338:19060 (LC230531) | 0.79%     | nrfA_Welsh;AJ697839;location.<1..>nrfA_Welsh;478.;uncultured.b<br>acterium.definition.cytochrome.c.nitrite.reductase  | 2E-13   |
| <i>nrfA</i> | M01935:46:000000000-AC602:1:1104<br>:20179:8852 (LC230532)  | 0.41%     | nrfA_Welsh;AJ697838;location.<2..>nrfA_Welsh;493.;uncultured.b<br>acterium.definition.cytochrome.c.nitrite.reductase  | 5E-17   |
| <i>nrfA</i> | M01935:46:000000000-AC602:1:1103<br>:22550:21221 (LC230533) | 0.20%     | nrfA_Welsh;AJ697846;location.<1..>nrfA_Welsh;487.;uncultured.b<br>acterium.definition.cytochrome.c.nitrite.reductase  | 9E-25   |
| <i>nrfA</i> | M01935:46:000000000-AC602:1:1101<br>:6607:14800 (LC230534)  | 0.18%     | nrfA_Welsh;JX293781;location.<1..>nrfA_Welsh;236.;uncultured.b<br>acterium.definition.nitrite.reductase               | 3E-15   |
| <i>nrfA</i> | M01935:46:000000000-AC602:1:1103<br>:28627:7853 (LC230535)  | 0.15%     | nrfA_Welsh;CP006772;location.complement(2473277..2474770).;B<br>acteroidales.bacterium.CF.definition.Cytochrome.c-552 | 9E-99   |
| <i>nrfA</i> | M01935:46:000000000-AC602:1:1103<br>:3265:19429 (LC230536)  | 0.13%     | nrfA_Welsh;AJ697839;location.<1..>nrfA_Welsh;478.;uncultured.b<br>acterium.definition.cytochrome.c.nitrite.reductase  | 7E-13   |
| <i>nrfA</i> | M01935:46:000000000-AC602:1:1103<br>:13912:18378 (LC230537) | 0.12%     | nrfA_Welsh;FJ810664;location.<1..>nrfA_Welsh;463.;uncultured.b<br>acterium.definition.cytochrome.c.nitrite.reductase  | 2E-62   |



| Gene        | OTU (accession number)                                      | Abundance | blast hit                                                                                                                                                                               | e-value |
|-------------|-------------------------------------------------------------|-----------|-----------------------------------------------------------------------------------------------------------------------------------------------------------------------------------------|---------|
| <i>nrfA</i> | M01935:46:000000000-AC602:1:1101<br>:13953:20862 (LC230538) | 0.10%     | nrfA_Welsh;JX293802;location.<1..>nrfA_Welsh;236.;uncultured.b<br>acterium.definition.nitrite.reductase                                                                                 | 9E-28   |
| <i>nrfA</i> | M01935:46:000000000-AC602:1:1102<br>:10149:9239 (LC230539)  | 0.072%    | nrfA_Welsh;CP001816;location.704163..705710.;Sulfurospirillum.<br>deleyianum.DSM.6946.definition.Nitrite.reductase.(cytochrome; am<br>monia-forming)                                    | 1E-21   |
| <i>nrfA</i> | M01935:46:000000000-AC602:1:1101<br>:15550:6901 (LC256825)  | 0.060%    | nrfA_Welsh;AMFJ01031605;location.2141..3637.;uncultured.bacte<br>rium.definition.hypothetical.protein                                                                                   | 2E-14   |
| <i>nrfA</i> | M01935:46:000000000-AC602:1:1101<br>:21481:8185 (LC230540)  | 0.053%    | nrfA_Welsh;FJ810667;location.<1..>nrfA_Welsh;463.;uncultured.b<br>acterium.definition.cytochrome.c.nitrite.reductase                                                                    | 6E-66   |
| <i>nrfA</i> | M01935:46:000000000-AC602:1:1102<br>:19252:21428 (LC230541) | 0.038%    | nrfA_Welsh;FJ810664;location.<1..>nrfA_Welsh;463.;uncultured.b<br>acterium.definition.cytochrome.c.nitrite.reductase                                                                    | 6E-66   |
| <i>nrfA</i> | M01935:46:000000000-AC602:1:1104<br>:18496:9666 (LC230542)  | 0.026%    | nrfA_Welsh;JX293749;location.<1..>nrfA_Welsh;236.;uncultured.b<br>acterium.definition.nitrite.reductase                                                                                 | 8E-13   |
| <i>nrfA</i> | M01935:46:000000000-AC602:1:1101<br>:22540:13504 (LC230543) | 0.017%    | nrfA_Welsh;JX293802;location.<1..>nrfA_Welsh;236.;uncultured.b<br>acterium.definition.nitrite.reductase                                                                                 | 6E-35   |
| <i>nrfA</i> | M01935:46:000000000-AC602:1:1105<br>:25807:14075 (LC230544) | 0.010%    | nrfA_Welsh;CP000251;location.complement(1053180..1054652).;<br>Anaeromyxobacter.dehalogenans.2CP-C.definition.respiratory.nitrit<br>e.reductase.(cytochrome; ammonia-forming).precursor | 4E-33   |

| Gene        | OTU (accession number)                                      | Abundance | blast hit                                                                                                                               | e-value |
|-------------|-------------------------------------------------------------|-----------|-----------------------------------------------------------------------------------------------------------------------------------------|---------|
| <i>nrfA</i> | M01935:46:000000000-AC602:1:1102<br>:19552:21255 (LC230545) | 0.002%    | nrfA_Welsh;FJ810666;location.<1..>nrfA_Welsh;463.;uncultured.bacterium.definition.cytochrome.c.nitrite.reductase                        | 2E-63   |
| <i>napA</i> | M01935:46:000000000-AC602:1:1105<br>:27601:19180 (LC230546) | 4.1%      | napA;AP012048;location.complement(476588..479398).;Arcobacter.sp..L.definition.nitrate.reductase.catalytic.subunit                      | 2E-110  |
| <i>napA</i> | M01935:46:000000000-AC602:1:1101<br>:17212:15418 (LC230547) | 3.5%      | napA;EU495680;location.<1..>napA;495.;uncultured.bacterium.definition.NapA                                                              | 1E-19   |
| <i>napA</i> | M01935:46:000000000-AC602:1:1103<br>:14228:3701 (LC230548)  | 2.3%      | napA;CP006615;location.complement(357757..360567).;Arcobacter.butzleri.7h1h.definition.periplasmic.nitrate.reductase..large.subunit     | 7E-101  |
| <i>napA</i> | M01935:46:000000000-AC602:1:1101<br>:12110:5606 (LC230549)  | 2.0%      | napA;CP006615;location.complement(357757..360567).;Arcobacter.butzleri.7h1h.definition.periplasmic.nitrate.reductase..large.subunit     | 1E-124  |
| <i>napA</i> | M01935:46:000000000-AC602:1:1102<br>:27788:19549 (LC230550) | 1.9%      | napA;AM406670;location.complement(4318452..4320995).;Azoarcus.sp..BH72.definition.probable.nitrate.reductase                            | 4E-84   |
| <i>napA</i> | M01935:46:000000000-AC602:1:1101<br>:21224:12340 (LC230551) | 1.8%      | napA;CP002356;location.57110..59896.;Sulfuricurvum.kujiense.DSM.16994.definition.periplasmic.nitrate.reductase.subunit.NapA.apo.protein | 0       |
| <i>napA</i> | M01935:46:000000000-AC602:1:1101<br>:7711:20933 (LC230177)  | 1.7%      | napA;CP002356;location.57110..59896.;Sulfuricurvum.kujiense.DSM.16994.definition.periplasmic.nitrate.reductase.subunit.NapA.apo.protein | 1E-50   |
| <i>napA</i> | M01935:46:000000000-AC602:1:1102<br>:5903:13161 (LC230552)  | 1.3%      | napA;KF056876;location.<1..>napA;399.;uncultured.Sulfurospirillum.sp..definition.periplasmic.nitrate.reductase.subunit.A                | 3E-78   |

| Gene        | OTU (accession number)                                      | Abundance | blast hit                                                                                                                                         | e-value |
|-------------|-------------------------------------------------------------|-----------|---------------------------------------------------------------------------------------------------------------------------------------------------|---------|
| <i>napA</i> | M01935:46:000000000-AC602:1:1104<br>:16899:6872 (LC230553)  | 1.2%      | napA;CP000089;location.complement(3764048..3766561).;Dechloromonas.aromatica.RCB.definition.periplasmic.nitrate.reductase.subunit.NapA.apoprotein | 4E-65   |
| <i>napA</i> | M01935:46:000000000-AC602:1:1101<br>:6587:12081 (LC230554)  | 0.78%     | napA;KF056876;location.<1..>napA;399.;uncultured.Sulfurospirillum.sp..definition.periplasmic.nitrate.reductase.subunit.A                          | 5E-80   |
| <i>napA</i> | M01935:46:000000000-AC602:1:1102<br>:23549:14921 (LC230555) | 0.77%     | napA;CP003153;location.511069..513594.;Dechlorosoma.suillum.P.S.definition.periplasmic.nitrate.reductase..large.subunit                           | 3E-29   |
| <i>napA</i> | M01935:46:000000000-AC602:1:1104<br>:21849:20047 (LC230556) | 0.67%     | napA;EU125408;location.<1..>napA;414.;uncultured.bacterium.definition.periplasmic.nitrate.reductase                                               | 4E-59   |
| <i>napA</i> | M01935:46:000000000-AC602:1:1101<br>:9603:10281 (LC256826)  | 0.66%     | napA;KF056876;location.<1..>napA;399.;uncultured.Sulfurospirillum.sp..definition.periplasmic.nitrate.reductase.subunit.A                          | 2E-55   |
| <i>napA</i> | M01935:46:000000000-AC602:1:1101<br>:14839:5298 (LC230557)  | 0.62%     | napA;EU526312;location.<1..>napA;1845.;Sulfurospirillum.arsenophilum.definition.periplasmic.nitrate.reductase.catalytic.subunit                   | 2E-24   |
| <i>napA</i> | M01935:46:000000000-AC602:1:1104<br>:22760:20925 (LC230558) | 0.59%     | napA;HQ727705;location.<1..>napA;462.;uncultured.Thauera.sp..definition.periplasmic.nitrate.reductase.subunit                                     | 8E-33   |
| <i>napA</i> | M01935:46:000000000-AC602:1:1101<br>:4947:6387 (LC230559)   | 0.59%     | napA;EU495669;location.<1..>napA;493.;uncultured.bacterium.definition.NapA                                                                        | 5E-34   |
| <i>napA</i> | M01935:46:000000000-AC602:1:1101<br>:6937:22605 (LC230560)  | 0.55%     | napA;CP006615;location.complement(357757..360567).;Arcobacter.butzleri.7h1h.definition.periplasmic.nitrate.reductase..large.subunit               | 2E-113  |
| <i>napA</i> | M01935:46:000000000-AC602:1:1101<br>:13141:8748 (LC230561)  | 0.52%     | napA;FQ311870;location.739528..742020.;Azospirillum.lipoferum.4B.definition.periplasmic.nitrate.reductase..large.subunit                          | 3E-32   |

| Gene        | OTU (accession number)                                      | Abundance | blast hit                                                                                                                                                 | e-value |
|-------------|-------------------------------------------------------------|-----------|-----------------------------------------------------------------------------------------------------------------------------------------------------------|---------|
| <i>napA</i> | M01935:46:000000000-AC602:1:1104<br>:26652:4645 (LC230562)  | 0.51%     | napA;CP003153;location.511069..513594.;Dechlorosoma.suillum.P<br>S.definition.periplasmic.nitrate.reductase..large.subunit                                | 2E-27   |
| <i>napA</i> | M01935:46:000000000-AC602:1:1101<br>:17278:9108 (LC230563)  | 0.33%     | napA;CP000089;location.complement(3764048..3766561).;Dechlor<br>omonas.aromatica.RCB.definition.periplasmic.nitrate.reductase.sub<br>unit.NapA.apoprotein | 3E-75   |
| <i>napA</i> | M01935:46:000000000-AC602:1:1104<br>:2537:17138 (LC230564)  | 0.27%     | napA;CP003153;location.511069..513594.;Dechlorosoma.suillum.P<br>S.definition.periplasmic.nitrate.reductase..large.subunit                                | 1E-19   |
| <i>napA</i> | M01935:46:000000000-AC602:1:1101<br>:20774:9566 (LC230565)  | 0.23%     | napA;AJXE01000032;location.25416..27920.;Pseudomonas.stutzeri<br>.TS44.definition.nitrate.reductase.catalytic.subunit                                     | 9E-88   |
| <i>napA</i> | M01935:46:000000000-AC602:1:1105<br>:7824:6465 (LC230566)   | 0.18%     | napA;AJ004933;location.739..>napA;2415.;Rhodopseudomonas.sp.<br>.definition.periplasmic.nitrate.reductase..large.subunit                                  | 3E-72   |
| <i>napA</i> | M01935:46:000000000-AC602:1:1103<br>:19275:11498 (LC230567) | 0.15%     | napA;HQ727705;location.<1..>napA;462.;uncultured.Thauera.sp..d<br>efinition.periplasmic.nitrate.reductase.subunit                                         | 2E-30   |
| <i>napA</i> | M01935:46:000000000-AC602:1:1102<br>:4767:6662 (LC230568)   | 0.15%     | napA;CP000491;location.207310..209805.;Paracoccus.denitrificans.<br>PD1222.definition.periplasmic.nitrate.reductase.subunit.NapA.apop<br>rotein           | 1E-37   |
| <i>napA</i> | M01935:46:000000000-AC602:1:1102<br>:10019:22845 (LC230569) | 0.14%     | napA;AFOT01000197;location.48043..50526.;Vibrio.cholerae.HC-<br>02A1.definition.periplasmic.nitrate.reductase..large.subunit                              | 5E-34   |
| <i>napA</i> | M01935:46:000000000-AC602:1:1104<br>:23572:20725 (LC230570) | 0.065%    | napA;AP010946;location.complement(299590..302091).;Azospirill<br>um.sp..B510.definition.periplasmic.nitrate.reductase                                     | 9E-88   |

| Gene        | OTU (accession number)                                      | Abundance | blast hit                                                                                                                                                 | e-value |
|-------------|-------------------------------------------------------------|-----------|-----------------------------------------------------------------------------------------------------------------------------------------------------------|---------|
| <i>napA</i> | M01935:46:000000000-AC602:1:1102<br>:18841:4177 (LC230571)  | 0.060%    | napA;CP003153;location.511069..513594.;Dechlorosoma.suillum.P<br>S.definition.periplasmic.nitrate.reductase..large.subunit                                | 1E-28   |
| <i>napA</i> | M01935:46:000000000-AC602:1:1103<br>:20939:6727 (LC230572)  | 0.057%    | napA;KF056876;location.<1..>napA;399.;uncultured.Sulfurospirillu<br>m.sp..definition.periplasmic.nitrate.reductase.subunit.A                              | 2E-95   |
| <i>napA</i> | M01935:46:000000000-AC602:1:1103<br>:5606:18171 (LC230573)  | 0.002%    | napA;CP006615;location.complement(357757..360567).;Arcobacter<br>.butzleri.7h1h.definition.periplasmic.nitrate.reductase..large.subunit                   | 2E-125  |
| <i>napA</i> | M01935:46:000000000-AC602:1:1103<br>:14783:6540 (LC230574)  | 0.002%    | napA;AM406670;location.complement(4318452..4320995).;Azoarc<br>us.sp..BH72.definition.probable.nitrate.reductase                                          | 6E-83   |
| <i>napA</i> | M01935:46:000000000-AC602:1:1102<br>:14370:21111 (LC230575) | 0.002%    | napA;CP000089;location.complement(3764048..3766561).;Dechlor<br>omonas.aromatica.RCB.definition.periplasmic.nitrate.reductase.sub<br>unit.NapA.apoprotein | 7E-24   |
| <i>nosZ</i> | M01935:46:000000000-AC602:1:1101<br>:23159:2892 (LC230576)  | 1.4%      | nosZ;AB545690;location.<1.660.;Azospirillum.sp..TSO32-4.definit<br>ion.nitrous.oxide.reductase                                                            | 4E-70   |
| <i>nosZ</i> | M01935:46:000000000-AC602:1:1101<br>:18615:3185 (LC230577)  | 1.4%      | nosZ;HQ625260;location.<1.702.;uncultured.bacterium.definition.n<br>itrous.oxide.reductase                                                                | 2E-102  |
| <i>nosZ</i> | M01935:46:000000000-AC602:1:1101<br>:9809:9444 (LC230578)   | 1.4%      | nosZ;EU083520;location.complement(<1.1090).;uncultured.bacteri<br>um.definition.nitrous.oxide.reductase                                                   | 9E-59   |
| <i>nosZ</i> | M01935:46:000000000-AC602:1:1101<br>:10329:4022 (LC230579)  | 0.76%     | nosZ;HQ625260;location.<1.702.;uncultured.bacterium.definition.n<br>itrous.oxide.reductase                                                                | 5E-91   |
| <i>nosZ</i> | M01935:46:000000000-AC602:1:1103<br>:6645:15238 (LC230580)  | 0.75%     | nosZ;JQ038958;location.<1.423.;uncultured.bacterium.definition.pu<br>tative.nitrous.oxide.reductase                                                       | 2E-53   |

| Gene        | OTU (accession number)                                      | Abundance | blast hit                                                                                           | e-value |
|-------------|-------------------------------------------------------------|-----------|-----------------------------------------------------------------------------------------------------|---------|
| <i>nosZ</i> | M01935:46:000000000-AC602:1:1103<br>:12120:20219 (LC230581) | 0.70%     | nosZ;EU053040;location.<1.673.;uncultured.bacterium.definition.nitrous.oxide.reductase              | 8E-121  |
| <i>nosZ</i> | M01935:46:000000000-AC602:1:1102<br>:8124:16077 (LC230582)  | 0.66%     | nosZ;EU053057;location.<1.673.;uncultured.bacterium.definition.nitrous.oxide.reductase              | 3E-108  |
| <i>nosZ</i> | M01935:46:000000000-AC602:1:1103<br>:22216:8472 (LC230583)  | 0.45%     | nosZ;GU362730;location.<1.455.;uncultured.bacterium.definition.nitrous.oxide.reductase              | 1E-76   |
| <i>nosZ</i> | M01935:46:000000000-AC602:1:1104<br>:10465:20668 (LC230584) | 0.38%     | nosZ;AY577569;location.<1.454.;uncultured.bacterium.definition.nitrous.oxide.reductase              | 4E-95   |
| <i>nosZ</i> | M01935:46:000000000-AC602:1:1102<br>:19787:5810 (LC230585)  | 0.37%     | nosZ;HQ625260;location.<1.702.;uncultured.bacterium.definition.nitrous.oxide.reductase              | 4E-51   |
| <i>nosZ</i> | M01935:46:000000000-AC602:1:1101<br>:14046:14670 (LC230586) | 0.32%     | nosZ;AY913224;location.<1.645.;uncultured.forest.soil.bacterium.definition.nitrous.oxide.reductase  | 1E-98   |
| <i>nosZ</i> | M01935:46:000000000-AC602:1:1101<br>:18723:15921 (LC230587) | 0.32%     | nosZ;EU192075;location.<1.710.;Paracoccus.sp..BW001.definition.nitrous.oxide.reductase              | 6E-100  |
| <i>nosZ</i> | M01935:46:000000000-AC602:1:1103<br>:19765:19753 (LC256827) | 0.31%     | nosZ;EU083518;location.complement(<1.1093).;uncultured.bacterium.definition.nitrous.oxide.reductase | 1E-104  |
| <i>nosZ</i> | M01935:46:000000000-AC602:1:1102<br>:7815:12954 (LC230588)  | 0.30%     | nosZ;AY425164;location.<1.457.;uncultured.bacterium.definition.nitrous.oxide.reductase              | 2E-47   |
| <i>nosZ</i> | M01935:46:000000000-AC602:1:1102<br>:12182:17030 (LC230589) | 0.24%     | nosZ;JF509086;location.<1.707.;uncultured.bacterium.definition.nitrous.oxide.reductase              | 1E-48   |

| Gene        | OTU (accession number)                                      | Abundance | blast hit                                                                                                                                                | e-value |
|-------------|-------------------------------------------------------------|-----------|----------------------------------------------------------------------------------------------------------------------------------------------------------|---------|
| <i>nosZ</i> | M01935:46:000000000-AC602:1:1102<br>:15775:21101 (LC230590) | 0.20%     | nosZ;AY325700;location.<1.663.;uncultured.bacterium.definition.p<br>utative.nitrous.oxide.reductase                                                      | 7E-38   |
| <i>nosZ</i> | M01935:46:000000000-AC602:1:1102<br>:27348:14691 (LC230591) | 0.11%     | nosZ;FN868506;location.<1.387.;uncultured.bacterium.definition.ni<br>trous-oxide.reductase                                                               | 1E-94   |
| <i>nosZ</i> | M01935:46:000000000-AC602:1:1104<br>:17010:13433 (LC230592) | 0.033%    | nosZ;KC936777;location.<1.267.;uncultured.bacterium.definition.ni<br>trous.oxide.reductase                                                               | 2E-44   |
| <i>nosZ</i> | M01935:46:000000000-AC602:1:1103<br>:23064:10017 (LC230593) | 0.029%    | nosZ;AY913111;location.<1.672.;uncultured.forest.soil.bacterium.d<br>efinition.nitrous.oxide.reductase                                                   | 1E-38   |
| <i>norB</i> | M01935:46:000000000-AC602:1:1101<br>:24190:9926 (LC230214)  | 4.2%      | norB;HQ615313;location.<1.>norB;646.;uncultured.bacterium.defi<br>nition.putative.nitric.oxide.reductase                                                 | 6E-26   |
| <i>norB</i> | M01935:46:000000000-AC602:1:1101<br>:17679:2202 (LC230594)  | 1.5%      | norB;HF936747;location.<1.>norB;453.;uncultured.bacterium.defi<br>nition.nitric.oxide.reductase                                                          | 5E-71   |
| <i>norB</i> | M01935:46:000000000-AC602:1:1104<br>:26137:6035 (LC230215)  | 1.1%      | norB;CP000478;location.complement(3622744..3625020).;Syntrop<br>hobacter.fumaroxidans.MPOB.definition.cytochrome.b.subunit.of.ni<br>tric.oxide.reductase | 1E-101  |
| <i>norB</i> | M01935:46:000000000-AC602:1:1101<br>:27731:6386 (LC230595)  | 1.0%      | norB;AP007255;location.complement(3147718..3149037).;Magneto<br>spirillum.magneticum.AMB-1.definition.Nitric.oxide.reductase.larg<br>e.subunit           | 1E-83   |
| <i>norB</i> | M01935:46:000000000-AC602:1:1101<br>:22677:8842 (LC230596)  | 0.83%     | norB;CU459003;location.1460427..1461764.;Magnetospirillum.gry<br>phiswaldense.MSR-1.definition.Nitric-oxide.reductase.subunit.B                          | 4E-53   |

| Gene        | OTU (accession number)                                      | Abundance | blast hit                                                                                                                          | e-value |
|-------------|-------------------------------------------------------------|-----------|------------------------------------------------------------------------------------------------------------------------------------|---------|
| <i>norB</i> | M01935:46:000000000-AC602:1:1103<br>:4240:13149 (LC230597)  | 0.31%     | norB;AM284362;location.<1..>norB;419.;Paracoccus.sp..R-28244.d<br>efinition.nitric.oxide.reductase.CnorB                           | 1E-145  |
| <i>norB</i> | M01935:46:000000000-AC602:1:1103<br>:8592:14229 (LC230598)  | 0.27%     | norB;AM284368;location.<1..>norB;433.;Acidovorax.sp..R-24667.<br>definition.nitric.oxide.reductase.CnorB                           | 2E-122  |
| <i>norB</i> | M01935:46:000000000-AC602:1:1105<br>:16314:15577 (LC230599) | 0.25%     | norB;AM284370;location.<1..>norB;436.;Azovibrio.sp..R-25062.de<br>finition.nitric.oxide.reductase.CnorB                            | 2E-79   |
| <i>norB</i> | M01935:46:000000000-AC602:1:1104<br>:12454:16930 (LC230600) | 0.24%     | norB;AM284381;location.<1..>norB;420.;Dechloromonas.sp..R-28<br>401.definition.nitric.oxide.reductase.CnorB                        | 3E-155  |
| <i>norB</i> | M01935:46:000000000-AC602:1:1102<br>:15074:20849 (LC230601) | 0.22%     | norB;CP000830;location.3347463..3348842.;Dinoroseobacter.shiba<br>e.DFL.12...DSM.16493.definition.nitric.oxide.reductase.subunit.B | 8E-57   |
| <i>norB</i> | M01935:46:000000000-AC602:1:1104<br>:25631:18240 (LC230602) | 0.22%     | norB;CP001280;location.1637157..1638512.;Methylocella.silvestris<br>.BL2.definition.Nitric-oxide.reductase                         | 1E-46   |
| <i>norB</i> | M01935:46:000000000-AC602:1:1103<br>:10975:24561 (LC230603) | 0.17%     | norB;HF936748;location.<1..>norB;455.;uncultured.bacterium.defi<br>nition.nitric.oxide.reductase                                   | 9E-51   |
| <i>norB</i> | M01935:46:000000000-AC602:1:1101<br>:12655:8400 (LC230604)  | 0.16%     | norB;AB014090;location.3757..5145.;Paracoccus.denitrificans.defin<br>ition.NorB                                                    | 1E-62   |
| <i>norB</i> | M01935:46:000000000-AC602:1:1105<br>:25461:20470 (LC230605) | 0.11%     | norB;FN600628;location.<1..>norB;353.;Bradyrhizobium.sp..GSM-<br>467.definition.cytochrome.c.dependent.nitric.oxide.reductase      | 2E-138  |
| <i>norB</i> | M01935:46:000000000-AC602:1:1103<br>:6275:8938 (LC230606)   | 0.050%    | norB;CP002083;location.611075..612424.;Hyphomicrobium.denitri<br>ficans.ATCC.51888.definition.Nitric-oxide.reductase               | 9E-51   |



| Gene        | OTU (accession number)                                      | Abundance | blast hit                                                                                                                       | e-value |
|-------------|-------------------------------------------------------------|-----------|---------------------------------------------------------------------------------------------------------------------------------|---------|
| <i>norB</i> | M01935:46:000000000-AC602:1:1104<br>:16297:14009 (LC230607) | 0.048%    | norB;CU459003;location.1460427..1461764.;Magnetospirillum.gry<br>phiswaldense.MSR-1.definition.Nitric-oxide.reductase.subunit.B | 2E-67   |
| <i>norB</i> | M01935:46:000000000-AC602:1:1102<br>:9076:10984 (LC230608)  | 0.033%    | norB;CU459003;location.1460427..1461764.;Magnetospirillum.gry<br>phiswaldense.MSR-1.definition.Nitric-oxide.reductase.subunit.B | 4E-53   |
| <i>norB</i> | M01935:46:000000000-AC602:1:1103<br>:9533:13647 (LC230609)  | 0.014%    | norB;CP002083;location.611075..612424.;Hyphomicrobium.denitri<br>ficans.ATCC.51888.definition.Nitric-oxide.reductase            | 4E-65   |
| <i>norB</i> | M01935:46:000000000-AC602:1:1101<br>:18901:5898 (LC256828)  | 0.010%    | norB;AM284340;location.<1..>norB;435.;Rhizobium.sp..R-24658.d<br>efinition.nitric.oxide.reductase.CnorB                         | 1E-145  |

b) UASB M

| Gene        | OTU (accession number)                                      | abundance | blast hit                                                                                             | e-value |
|-------------|-------------------------------------------------------------|-----------|-------------------------------------------------------------------------------------------------------|---------|
| <i>nxB</i>  | M01935:46:000000000-AC602:1:1102<br>:6087:15587 (LC230262)  | 0.69%     | nxB;AM286333;location.<1.>nxB;371.;Nitrobacter.sp..263.defini<br>tion.nitrite.oxidoreductase          | 6E-160  |
| <i>nirK</i> | M01935:46:000000000-AC602:1:1105<br>:26379:6299 (LC230267)  | 2.0%      | nirK;AB162934;location.<1.515.;uncultured.bacterium.definition.ni<br>trite.reductase                  | 9E-64   |
| <i>nirK</i> | M01935:46:000000000-AC602:1:1101<br>:10691:8522 (LC230268)  | 1.7%      | nirK;DQ232405;location.<1.480.;uncultured.bacterium.definition.N<br>irK                               | 0       |
| <i>nirK</i> | M01935:46:000000000-AC602:1:1102<br>:7924:14095 (LC230269)  | 1.7%      | nirK;HQ162043;location.<1.473.;uncultured.bacterium.definition.ni<br>trite.reductase                  | 4E-143  |
| <i>nirK</i> | M01935:46:000000000-AC602:1:1103<br>:28415:18155 (LC256813) | 1.3%      | nirK;HM116323;location.<1.474.;uncultured.bacterium.definition.n<br>itrite.reductase                  | 4E-35   |
| <i>nirK</i> | M01935:46:000000000-AC602:1:1103<br>:24593:14554 (LC230270) | 1.3%      | nirK;AB162323;location.<1.515.;uncultured.bacterium.definition.ni<br>trite.reductase                  | 0       |
| <i>nirK</i> | M01935:46:000000000-AC602:1:1102<br>:8263:11887 (LC230271)  | 1.1%      | nirK;JN255536;location.<1.515.;uncultured.bacterium.definition.nit<br>rite.reductase                  | 2E-111  |
| <i>nirK</i> | M01935:46:000000000-AC602:1:1101<br>:24059:22435 (LC230272) | 0.85%     | nirK;HM116353;location.<1.474.;uncultured.bacterium.definition.n<br>itrite.reductase                  | 0       |
| <i>nirK</i> | M01935:46:000000000-AC602:1:1101<br>:11639:17149 (LC230273) | 0.79%     | nirK;AB162328;location.<1.515.;uncultured.bacterium.definition.ni<br>trite.reductase                  | 0       |
| <i>nirK</i> | M01935:46:000000000-AC602:1:1107<br>:21964:11331 (LC230274) | 0.70%     | nirK;GQ496041;location.<1.474.;uncultured.bacterium.definition.c<br>opper.dependent.nitrite.reductase | 0       |

|             |                                                             |       |                                                                                                        |        |
|-------------|-------------------------------------------------------------|-------|--------------------------------------------------------------------------------------------------------|--------|
| <i>nirK</i> | M01935:46:000000000-AC602:1:1102<br>:13287:18127 (LC230275) | 0.64% | nirK;HM628827;location.<1.474.;uncultured.bacterium.definition.c<br>opper-containing.nitrite.reductase | 3E-42  |
| <i>nirK</i> | M01935:46:000000000-AC602:1:1102<br>:11114:6529 (LC230276)  | 0.52% | nirK;AB453564;location.<1.436.;uncultured.bacterium.definition.ni<br>trite.reductase                   | 5E-90  |
| <i>nirK</i> | M01935:46:000000000-AC602:1:1101<br>:13050:10679 (LC230277) | 0.51% | nirK;DQ996546;location.<1.503.;uncultured.bacterium.definition.N<br>irK                                | 0      |
| <i>nirK</i> | M01935:46:000000000-AC602:1:1102<br>:17212:18683 (LC230278) | 0.49% | nirK;AY583400;location.<1.473.;uncultured.bacterium.definition.ni<br>trite.reductase                   | 2E-178 |
| <i>nirK</i> | M01935:46:000000000-AC602:1:1103<br>:15359:9073 (LC230279)  | 0.49% | nirK;AM230886;location.<1.447.;Paracoccus.sp..R-28242.definitio<br>n.nitrite.reductase                 | 2E-138 |
| <i>nirK</i> | M01935:46:000000000-AC602:1:1102<br>:7799:12742 (LC230280)  | 0.45% | nirK;AB684572;location.<1.433.;uncultured.bacterium.definition.ni<br>trite.reductase                   | 3E-51  |
| <i>nirK</i> | M01935:46:000000000-AC602:1:1102<br>:25955:5682 (LC230281)  | 0.35% | nirK;HM116353;location.<1.474.;uncultured.bacterium.definition.n<br>itrite.reductase                   | 3E-171 |
| <i>nirK</i> | M01935:46:000000000-AC602:1:1107<br>:4024:20652 (LC230282)  | 0.31% | nirK;AB162933;location.<1.515.;uncultured.bacterium.definition.ni<br>trite.reductase                   | 0      |
| <i>nirK</i> | M01935:46:000000000-AC602:1:1111<br>:10607:6193 (LC230283)  | 0.31% | nirK;AB453443;location.<1.436.;uncultured.bacterium.definition.ni<br>trite.reductase                   | 0      |
| <i>nirK</i> | M01935:46:000000000-AC602:1:1104<br>:8543:10716 (LC230284)  | 0.31% | nirK;HM116322;location.<1.474.;uncultured.bacterium.definition.n<br>itrite.reductase                   | 0      |
| <i>nirK</i> | M01935:46:000000000-AC602:1:1109<br>:14967:6558 (LC230285)  | 0.25% | nirK;AB118903;location.<1.515.;uncultured.bacterium.definition.ni<br>trite.reductase                   | 8E-138 |
| <i>nirK</i> | M01935:46:000000000-AC602:1:1103                            | 0.25% | nirK;DQ182205;location.<1.473.;uncultured.bacterium.definition.p                                       | 1E-81  |

|             |                                                             |        |                                                                                                                              |        |
|-------------|-------------------------------------------------------------|--------|------------------------------------------------------------------------------------------------------------------------------|--------|
|             | :8524:6041 (LC230286)                                       |        | utative.nitrite.reductase                                                                                                    |        |
| <i>nirK</i> | M01935:46:000000000-AC602:1:1102<br>:12556:5997 (LC230287)  | 0.17%  | nirK;DQ182218;location.<1.473.;uncultured.bacterium.definition.p<br>utative.nitrite.reductase                                | 1E-118 |
| <i>nirK</i> | M01935:46:000000000-AC602:1:1115<br>:6902:20649 (LC230288)  | 0.15%  | nirK;AM419528;location.<1.480.;uncultured.organism.definition.pu<br>tative.copper.containing.dissimilatory.nitrite.reductase | 2E-80  |
| <i>nirK</i> | M01935:46:000000000-AC602:1:1103<br>:23631:20146 (LC230289) | 0.12%  | nirK;DQ182164;location.<1.473.;uncultured.bacterium.definition.p<br>utative.nitrite.reductase                                | 9E-73  |
| <i>nirK</i> | M01935:46:000000000-AC602:1:1107<br>:7046:8626 (LC230290)   | 0.098% | nirK;HM628847;location.<1.474.;uncultured.bacterium.definition.c<br>opper-containing.nitrite.reductase                       | 6E-31  |
| <i>nirK</i> | M01935:46:000000000-AC602:1:1107<br>:20725:17395 (LC230291) | 0.095% | nirK;AY121544;location.<1.515.;uncultured.bacterium.definition.ni<br>trite.reductase                                         | 8E-101 |
| <i>nirK</i> | M01935:46:000000000-AC602:1:1104<br>:4435:20523 (LC230292)  | 0.088% | nirK;HQ162043;location.<1.473.;uncultured.bacterium.definition.ni<br>trite.reductase                                         | 2E-138 |
| <i>nirK</i> | M01935:46:000000000-AC602:1:1105<br>:17478:9459 (LC230293)  | 0.084% | nirK;AY583400;location.<1.473.;uncultured.bacterium.definition.ni<br>trite.reductase                                         | 8E-166 |
| <i>nirK</i> | M01935:46:000000000-AC602:1:1110<br>:4706:5004 (LC230294)   | 0.070% | nirK;EF615323;location.<1.473.;uncultured.bacterium.definition.nit<br>rite.reductase                                         | 3E-128 |
| <i>nirK</i> | M01935:46:000000000-AC602:1:1115<br>:14147:4820 (LC230295)  | 0.059% | nirK;DQ304381;location.<1.473.;uncultured.bacterium.definition.p<br>utative.nitrite.reductase                                | 3E-45  |
| <i>nirK</i> | M01935:46:000000000-AC602:1:1101<br>:18441:11502 (LC230296) | 0.052% | nirK;HQ162043;location.<1.473.;uncultured.bacterium.definition.ni<br>trite.reductase                                         | 2E-36  |
| <i>nirK</i> | M01935:46:000000000-AC602:1:1115<br>:4545:21439 (LC230297)  | 0.038% | nirK;HM116343;location.<1.474.;uncultured.bacterium.definition.n<br>itrite.reductase                                         | 0      |

|             |                                                             |        |                                                                                                        |        |
|-------------|-------------------------------------------------------------|--------|--------------------------------------------------------------------------------------------------------|--------|
| <i>nirK</i> | M01935:46:000000000-AC602:1:1111<br>:15768:19409 (LC230298) | 0.023% | nirK;GQ496041;location.<1.474.;uncultured.bacterium.definition.c<br>opper.dependent.nitrite.reductase  | 3E-159 |
| <i>nirK</i> | M01935:46:000000000-AC602:1:1115<br>:7958:15004 (LC230299)  | 0.016% | nirK;GU270500;location.complement(<1.515).;uncultured.bacteriu<br>m.definition.nitrite.reductase       | 4E-84  |
| <i>nirK</i> | M01935:46:000000000-AC602:1:1110<br>:15732:14096 (LC230300) | 0.015% | nirK;HM116307;location.<1.474.;uncultured.bacterium.definition.n<br>itrite.reductase                   | 0      |
| <i>nirK</i> | M01935:46:000000000-AC602:1:1111<br>:14957:20954 (LC230301) | 0.013% | nirK;DQ783969;location.<1.473.;uncultured.bacterium.definition.N<br>irK                                | 2E-77  |
| <i>nirK</i> | M01935:46:000000000-AC602:1:1113<br>:13050:4564 (LC230302)  | 0.011% | nirK;HQ162042;location.<1.473.;uncultured.bacterium.definition.ni<br>trite.reductase                   | 5E-124 |
| <i>nirK</i> | M01935:46:000000000-AC602:1:1117<br>:15492:12356 (LC230303) | 0.007% | nirK;HQ162043;location.<1.473.;uncultured.bacterium.definition.ni<br>trite.reductase                   | 7E-157 |
| <i>nirK</i> | M01935:46:000000000-AC602:1:1110<br>:26248:18058 (LC230304) | 0.005% | nirK;GU136453;location.<1.515.;uncultured.Ochrobactrum.sp..defi<br>nition.NirK                         | 8E-135 |
| <i>nirK</i> | M01935:46:000000000-AC602:1:1106<br>:18524:15519 (LC230305) | 0.003% | nirK;AY583400;location.<1.473.;uncultured.bacterium.definition.ni<br>trite.reductase                   | 4E-121 |
| <i>nirK</i> | M01935:46:000000000-AC602:1:1109<br>:10841:21968 (LC230306) | 0.003% | nirK;HM116315;location.<1.473.;uncultured.bacterium.definition.n<br>itrite.reductase                   | 2E-86  |
| <i>nirK</i> | M01935:46:000000000-AC602:1:1109<br>:12222:13732 (LC230307) | 0.003% | nirK;HM116315;location.<1.473.;uncultured.bacterium.definition.n<br>itrite.reductase                   | 1E-81  |
| <i>nirK</i> | M01935:46:000000000-AC602:1:1110<br>:27005:17944 (LC230308) | 0.003% | nirK;AB379562;location.<1.436.;uncultured.bacterium.definition.co<br>pper-containing.nitrate.reductase | 6E-37  |
| <i>nirK</i> | M01935:46:000000000-AC602:1:1113                            | 0.002% | nirK;AB453443;location.<1.436.;uncultured.bacterium.definition.ni                                      | 1E-136 |

|             |                                                             |        |                                                                                                                       |        |
|-------------|-------------------------------------------------------------|--------|-----------------------------------------------------------------------------------------------------------------------|--------|
|             | :18417:6883 (LC230309)                                      |        | trite.reductase                                                                                                       |        |
| <i>nirK</i> | M01935:46:000000000-AC602:1:1113<br>:29296:11543 (LC230310) | 0.002% | nirK;HM116353;location.<1.474.;uncultured.bacterium.definition.n<br>itrite.reductase                                  | 0      |
| <i>nirK</i> | M01935:46:000000000-AC602:1:1109<br>:15422:17888 (LC230311) | 0.002% | nirK;HQ162041;location.<1.474.;uncultured.bacterium.definition.ni<br>trite.reductase                                  | 9E-107 |
| <i>nirK</i> | M01935:46:000000000-AC602:1:1107<br>:17666:4684 (LC230312)  | 0.002% | nirK;HM116322;location.<1.474.;uncultured.bacterium.definition.n<br>itrite.reductase                                  | 1E-164 |
| <i>nirK</i> | M01935:46:000000000-AC602:1:1106<br>:21629:2183 (LC230313)  | 0.002% | nirK;AB162323;location.<1.515.;uncultured.bacterium.definition.ni<br>trite.reductase                                  | 1E-145 |
| <i>nirS</i> | M01935:46:000000000-AC602:1:1101<br>:24724:7294 (LC230314)  | 2.3%   | nirS;AF549050;location.<1..>nirS;750.;uncultured.organism.definiti<br>on.nitrite.reductase                            | 5E-37  |
| <i>nirS</i> | M01935:46:000000000-AC602:1:1105<br>:5158:15834 (LC230315)  | 0.76%  | nirS;AY583452;location.<1..>nirS;414.;uncultured.bacterium.defini<br>tion.nitrite.reductase                           | 3E-41  |
| <i>nirS</i> | M01935:46:000000000-AC602:1:1113<br>:20844:4087 (LC230316)  | 0.50%  | nirS;JN179356;location.<1..>nirS;660.;uncultured.bacterium.definit<br>ion.nitrite.reductase                           | 2E-76  |
| <i>nirS</i> | M01935:46:000000000-AC602:1:1106<br>:11576:21706 (LC230317) | 0.48%  | nirS;KC412684;location.<1..>nirS;894.;uncultured.bacterium.defini<br>tion.cytochrome.cd1-containing.nitrite.reductase | 6E-113 |
| <i>nirS</i> | M01935:46:000000000-AC602:1:1103<br>:11066:6052 (LC230318)  | 0.36%  | nirS;FR865832;location.<1..>nirS;408.;uncultured.bacterium.definit<br>ion.cd1-containing.nitrite.reductase            | 1E-96  |
| <i>nirS</i> | M01935:46:000000000-AC602:1:1106<br>:28549:12054 (LC230319) | 0.34%  | nirS;EF558502;location.<1..>nirS;885.;uncultured.bacterium.definit<br>ion.dissimilatory.nitrite.reductase             | 8E-60  |
| <i>nirS</i> | M01935:46:000000000-AC602:1:1102<br>:12861:8008 (LC230320)  | 0.28%  | nirS;JX941766;location.<1..>nirS;411.;uncultured.bacterium.definit<br>ion.nitrite.reductase                           | 2E-29  |

|             |                                                             |        |                                                                                                                         |        |
|-------------|-------------------------------------------------------------|--------|-------------------------------------------------------------------------------------------------------------------------|--------|
| <i>nirS</i> | M01935:46:000000000-AC602:1:1117<br>:24605:15061 (LC230321) | 0.19%  | nirS;HE616604;location.<1..>nirS;413.;uncultured.bacterium.defini<br>tion.nitrite.reductase.(cytochrome.cd1-containing) | 8E-91  |
| <i>nirS</i> | M01935:46:000000000-AC602:1:1108<br>:10365:12720 (LC256814) | 0.062% | nirS;EF558414;location.<1..>nirS;888.;uncultured.bacterium.definit<br>ion.dissimilatory.nitrite.reductase               | 3E-75  |
| <i>nirS</i> | M01935:46:000000000-AC602:1:1107<br>:12360:2600 (LC230322)  | 0.031% | nirS;HM116273;location.<1..>nirS;411.;uncultured.bacterium.defini<br>tion.nitrite.reductase                             | 2E-156 |
| <i>nifH</i> | M01935:46:000000000-AC602:1:1101<br>:16190:6151 (LC230323)  | 7.2%   | nifH;EF568543;location.<1..>nifH;354.;uncultured.microorganism.<br>definition.dinitrogenase.reductase                   | 1E-136 |
| <i>nifH</i> | M01935:46:000000000-AC602:1:1101<br>:24927:8705 (LC230324)  | 6.3%   | nifH;FJ381614;location.<1..>nifH;363.;uncultured.bacterium.definit<br>ion.dinitrogenase.reductase                       | 3E-66  |
| <i>nifH</i> | M01935:46:000000000-AC602:1:1101<br>:9358:13534 (LC256815)  | 5.1%   | nifH;FN555078;location.<1..>nifH;327.;uncultured.bacterium.defini<br>tion.dinitrogenase.reductase                       | 2E-55  |
| <i>nifH</i> | M01935:46:000000000-AC602:1:1101<br>:25013:11253 (LC230325) | 2.9%   | nifH;HQ660907;location.<1..>nifH;328.;uncultured.bacterium.defini<br>tion.dinitrogenase.reductase                       | 4E-161 |
| <i>nifH</i> | M01935:46:000000000-AC602:1:1101<br>:13001:5463 (LC230326)  | 2.6%   | nifH;X56071;location.132..959.;Methanobacterium.ivanovii.definiti<br>on.nitrogenase.Mo-Fe.protein                       | 2E-60  |
| <i>nifH</i> | M01935:46:000000000-AC602:1:1102<br>:5195:8124 (LC230327)   | 1.6%   | nifH;JN122952;location.<1..>nifH;369.;uncultured.bacterium.defini<br>tion.nitrogenase                                   | 2E-52  |
| <i>nifH</i> | M01935:46:000000000-AC602:1:1102<br>:11038:16808 (LC230328) | 1.1%   | nifH;EF568543;location.<1..>nifH;354.;uncultured.microorganism.<br>definition.dinitrogenase.reductase                   | 3E-165 |
| <i>nifH</i> | M01935:46:000000000-AC602:1:1101<br>:27271:5321 (LC230329)  | 0.82%  | nifH;EF568543;location.<1..>nifH;354.;uncultured.microorganism.<br>definition.dinitrogenase.reductase                   | 2E-153 |

|             |                                                             |       |                                                                                                                       |        |
|-------------|-------------------------------------------------------------|-------|-----------------------------------------------------------------------------------------------------------------------|--------|
| <i>nifH</i> | M01935:46:000000000-AC602:1:1105<br>:9041:17489 (LC256816)  | 0.77% | nifH;CP000867;location.complement(1694838..1695665).;Methanococcus.maripaludis.C6.definition.nitrogenase.iron.protein | 1E-15  |
| <i>nifH</i> | M01935:46:000000000-AC602:1:1101<br>:10416:11437 (LC230330) | 0.71% | nifH;FJ977296;location.<1..>nifH;606.;uncultured.Frankia.sp..definition.dinitrogenase.reductase                       | 1E-102 |
| <i>nifH</i> | M01935:46:000000000-AC602:1:1106<br>:18669:9070 (LC230331)  | 0.48% | nifH;X56071;location.132..959.;Methanobacterium.ivanovii.definition.nitrogenase.Mo-Fe.protein                         | 6E-39  |
| <i>nifH</i> | M01935:46:000000000-AC602:1:1102<br>:7774:21463 (LC230332)  | 0.45% | nifH;EF568543;location.<1..>nifH;354.;uncultured.microorganism.definition.dinitrogenase.reductase                     | 1E-148 |
| <i>nifH</i> | M01935:46:000000000-AC602:1:1102<br>:12127:7478 (LC230333)  | 0.45% | nifH;AY231492;location.<1..>nifH;324.;uncultured.nitrogen-fixing.bacterium.definition.dinitrogenase.reductase         | 7E-51  |
| <i>nifH</i> | M01935:46:000000000-AC602:1:1105<br>:21969:20362 (LC230334) | 0.44% | nifH;FN555079;location.<1..>nifH;327.;uncultured.bacterium.definition.dinitrogenase.reductase                         | 1E-53  |
| <i>nifH</i> | M01935:46:000000000-AC602:1:1105<br>:5787:6408 (LC230335)   | 0.44% | nifH;HM750561;location.<1..>nifH;417.;uncultured.bacterium.definition.dinitrogenase.reductase                         | 1E-62  |
| <i>nifH</i> | M01935:46:000000000-AC602:1:1104<br>:14189:20601 (LC230336) | 0.35% | nifH;JN122952;location.<1..>nifH;369.;uncultured.bacterium.definition.nitrogenase                                     | 2E-61  |
| <i>nifH</i> | M01935:46:000000000-AC602:1:1101<br>:23148:23374 (LC230337) | 0.19% | nifH;DQ520489;location.<1..>nifH;355.;uncultured.bacterium.definition.nitrogenase.iron.protein                        | 5E-18  |
| <i>nifH</i> | M01935:46:000000000-AC602:1:1101<br>:6653:6579 (LC230338)   | 0.17% | nifH;AY231493;location.<1..>nifH;324.;uncultured.nitrogen-fixing.bacterium.definition.dinitrogenase.reductase         | 7E-73  |
| <i>nifH</i> | M01935:46:000000000-AC602:1:1104<br>:6905:5052 (LC230339)   | 0.16% | nifH;FN555079;location.<1..>nifH;327.;uncultured.bacterium.definition.dinitrogenase.reductase                         | 7E-58  |



|             |                                                             |        |                                                                                                                                   |        |
|-------------|-------------------------------------------------------------|--------|-----------------------------------------------------------------------------------------------------------------------------------|--------|
| <i>nifH</i> | M01935:46:000000000-AC602:1:1101<br>:10618:14049 (LC230340) | 0.13%  | nifH;AEXQ01000094;location.2098..2847.;Turicibacter.sp..HGF1.definition.putative.nitrogenase.iron.protein                         | 5E-24  |
| <i>nifH</i> | M01935:46:000000000-AC602:1:1115<br>:19372:15401 (LC230341) | 0.13%  | nifH;AB184899;location.<1.>nifH;384.;uncultured.bacterium.definition.dinitrogenase.reductase                                      | 6E-39  |
| <i>nifH</i> | M01935:46:000000000-AC602:1:1117<br>:21677:8997 (LC230342)  | 0.13%  | nifH;AJ010290;location.<1.>nifH;383.;uncultured.microorganism.SN-33.definition.dinitrogenase.reductase                            | 3E-47  |
| <i>nifH</i> | M01935:46:000000000-AC602:1:1105<br>:20222:17932 (LC230343) | 0.11%  | nifH;AY196426;location.<1.>nifH;368.;uncultured.nitrogen-fixing.bacterium.definition.nitrogenase.iron.protein                     | 2E-66  |
| <i>nifH</i> | M01935:46:000000000-AC602:1:1106<br>:6907:18705 (LC230344)  | 0.10%  | nifH;X56071;location.132..959.;Methanobacterium.ivanovii.definition.nitrogenase.Mo-Fe.protein                                     | 3E-56  |
| <i>nifH</i> | M01935:46:000000000-AC602:1:1103<br>:12354:22291 (LC230345) | 0.10%  | nifH;AAVO02000001;location.complement(285652..286431).;Ruminococcus.oboem.ATCC.29174.definition.putative.nitrogenase.iron.protein | 6E-144 |
| <i>nifH</i> | M01935:46:000000000-AC602:1:1103<br>:8426:5359 (LC230346)   | 0.085% | nifH;FJ502311;location.<1.>nifH;321.;uncultured.bacterium.definition.NifH                                                         | 3E-106 |
| <i>nifH</i> | M01935:46:000000000-AC602:1:1105<br>:14368:22179 (LC230347) | 0.080% | nifH;EF199951;location.<1.>nifH;449.;Halorhodospira.halophila.definition.nitrogenase.iron.protein                                 | 3E-122 |
| <i>nifH</i> | M01935:46:000000000-AC602:1:1108<br>:24365:13095 (LC230348) | 0.079% | nifH;HQ660907;location.<1.>nifH;328.;uncultured.bacterium.definition.dinitrogenase.reductase                                      | 2E-129 |
| <i>nifH</i> | M01935:46:000000000-AC602:1:1105<br>:19314:24279 (LC230349) | 0.079% | nifH;EF196656;location.<1.>nifH;362.;uncultured.nitrogen-fixing.bacterium.definition.dinitrogenase.reductase                      | 3E-28  |

|             |                                                             |        |                                                                                                                          |        |
|-------------|-------------------------------------------------------------|--------|--------------------------------------------------------------------------------------------------------------------------|--------|
| <i>nifH</i> | M01935:46:000000000-AC602:1:1104<br>:24574:18870 (LC230350) | 0.077% | nifH;GQ452751;location.<1..>nifH;389.;uncultured.microorganism.<br>definition.NifH                                       | 8E-29  |
| <i>nifH</i> | M01935:46:000000000-AC602:1:1109<br>:11383:3318 (LC230351)  | 0.072% | nifH;HM750617;location.<1..>nifH;414.;uncultured.bacterium.defi<br>nition.dinitrogenase.reductase                        | 1E-99  |
| <i>nifH</i> | M01935:46:000000000-AC602:1:1113<br>:21914:2536 (LC230352)  | 0.064% | nifH;X56071;location.132..959.;Methanobacterium.ivanovii.definiti<br>on.nitrogenase.Mo-Fe.protein                        | 1E-27  |
| <i>nifH</i> | M01935:46:000000000-AC602:1:1109<br>:18781:10699 (LC230353) | 0.061% | nifH;AB208369;location.<1..>nifH;390.;uncultured.nitrogen-fixing.<br>bacterium.definition.dinitrogenase.reductase        | 2E-147 |
| <i>nifH</i> | M01935:46:000000000-AC602:1:1102<br>:8258:12248 (LC230354)  | 0.049% | nifH;AY224010;location.<1..>nifH;327.;uncultured.bacterium.defin<br>ition.dinitrogenase.reductase.Fe.protein             | 2E-45  |
| <i>nifH</i> | M01935:46:000000000-AC602:1:1108<br>:19579:17918 (LC230355) | 0.048% | nifH;FN555079;location.<1..>nifH;327.;uncultured.bacterium.defin<br>ition.dinitrogenase.reductase                        | 7E-52  |
| <i>nifH</i> | M01935:46:000000000-AC602:1:1106<br>:5678:18961 (LC230356)  | 0.034% | nifH;FN555078;location.<1..>nifH;327.;uncultured.bacterium.defin<br>ition.dinitrogenase.reductase                        | 1E-59  |
| <i>nifH</i> | M01935:46:000000000-AC602:1:1115<br>:22276:4483 (LC230357)  | 0.029% | nifH;AB208267;location.<1..>nifH;387.;uncultured.nitrogen-fixing.<br>bacterium.definition.dinitrogenase.reductase        | 3E-66  |
| <i>nifH</i> | M01935:46:000000000-AC602:1:1109<br>:19568:11923 (LC230358) | 0.029% | nifH;FP929036;location.1082045..1082920.;Butyrivibrio.fibrisolve<br>ns.16/4.definition.Nitrogenase.subunit.NifH.(ATPase) | 7E-11  |
| <i>nifH</i> | M01935:46:000000000-AC602:1:1106<br>:11970:17017 (LC230359) | 0.023% | nifH;DQ402773;location.<1..>nifH;417.;uncultured.nitrogen-fixing.<br>bacterium.definition.dinitrogenase.reductase        | 2E-52  |
| <i>nifH</i> | M01935:46:000000000-AC602:1:1104                            | 0.023% | nifH;DQ485356;location.<1..>nifH;350.;uncultured.bacterium.defin                                                         | 5E-56  |

|             |                                                             |        |                                                                                                                   |        |
|-------------|-------------------------------------------------------------|--------|-------------------------------------------------------------------------------------------------------------------|--------|
|             | :4417:16177 (LC230360)                                      |        | ition.dinitrogenase.reductase                                                                                     |        |
| <i>nifH</i> | M01935:46:000000000-AC602:1:1106<br>:13345:12687 (LC230361) | 0.020% | nifH;EF568543;location.<1..>nifH;354.;uncultured.microorganism.<br>definition.dinitrogenase.reductase             | 1E-124 |
| <i>nifH</i> | M01935:46:000000000-AC602:1:1103<br>:9770:15882 (LC230362)  | 0.020% | nifH;AB273420;location.<1..>nifH;424.;uncultured.nitrogen-fixing.<br>bacterium.definition.dinitrogenase.reductase | 3E-28  |
| <i>nifH</i> | M01935:46:000000000-AC602:1:1105<br>:11861:7056 (LC230363)  | 0.018% | nifH;EF568543;location.<1..>nifH;354.;uncultured.microorganism.<br>definition.dinitrogenase.reductase             | 1E-136 |
| <i>nifH</i> | M01935:46:000000000-AC602:1:1107<br>:5940:10149 (LC230364)  | 0.018% | nifH;FN555078;location.<1..>nifH;327.;uncultured.bacterium.defin<br>ition.dinitrogenase.reductase                 | 5E-62  |
| <i>nifH</i> | M01935:46:000000000-AC602:1:1106<br>:4650:11617 (LC230365)  | 0.013% | nifH;JN122953;location.<1..>nifH;369.;uncultured.bacterium.defini<br>tion.nitrogenase                             | 4E-84  |
| <i>nifH</i> | M01935:46:000000000-AC602:1:1105<br>:18226:12399 (LC230366) | 0.010% | nifH;FJ686519;location.<1..>nifH;362.;uncultured.bacterium.definit<br>ion.nitrogenase.reductase                   | 1E-31  |
| <i>nifH</i> | M01935:46:000000000-AC602:1:1114<br>:21401:6976 (LC230367)  | 0.008% | nifH;EF568543;location.<1..>nifH;354.;uncultured.microorganism.<br>definition.dinitrogenase.reductase             | 4E-118 |
| <i>nifH</i> | M01935:46:000000000-AC602:1:1113<br>:11048:19010 (LC230368) | 0.003% | nifH;HQ190142;location.<1..>nifH;426.;uncultured.bacterium.defin<br>ition.nitrogenase.component.II                | 4E-75  |
| <i>nifH</i> | M01935:46:000000000-AC602:1:1107<br>:20034:12348 (LC230369) | 0.002% | nifH;HQ190167;location.<1..>nifH;421.;uncultured.bacterium.defin<br>ition.nitrogenase.component.II                | 8E-101 |
| <i>nifH</i> | M01935:46:000000000-AC602:1:1108<br>:14155:15018 (LC230370) | 0.002% | nifH;HM750576;location.<1..>nifH;417.;uncultured.bacterium.defi<br>nition.dinitrogenase.reductase                 | 4E-87  |
| <i>nifH</i> | M01935:46:000000000-AC602:1:1114                            | 0.002% | nifH;FJ381614;location.<1..>nifH;363.;uncultured.bacterium.definit                                                | 6E-80  |

|             |                                                             |        |                                                                                                                   |       |
|-------------|-------------------------------------------------------------|--------|-------------------------------------------------------------------------------------------------------------------|-------|
|             | :15613:19473 (LC230371)                                     |        | ion.dinitrogenase.reductase                                                                                       |       |
| <i>nifH</i> | M01935:46:000000000-AC602:1:1115<br>:17279:24278 (LC230372) | 0.002% | nifH;FN555078;location.<1..>nifH;327.;uncultured.bacterium.definition.dinitrogenase.reductase                     | 5E-65 |
| <i>nifH</i> | M01935:46:000000000-AC602:1:1115<br>:14272:21189 (LC256817) | 0.002% | nifH;AM286444;location.<1..>nifH;290.;uncultured.bacterium.definition.nifH.protein                                | 2E-48 |
| <i>nrfA</i> | M01935:46:000000000-AC602:1:1102<br>:8996:23918 (LC230373)  | 2.0%   | nrfA_Welsh;AJ697846;location.<1..>nrfA_Welsh;487.;uncultured.bacterium.definition.cytochrome.c.nitrite.reductase  | 5E-23 |
| <i>nrfA</i> | M01935:46:000000000-AC602:1:1107<br>:9274:13398 (LC230374)  | 1.7%   | nrfA_Welsh;AJ697839;location.<1..>nrfA_Welsh;478.;uncultured.bacterium.definition.cytochrome.c.nitrite.reductase  | 2E-13 |
| <i>nrfA</i> | M01935:46:000000000-AC602:1:1101<br>:9732:7732 (LC230375)   | 0.36%  | nrfA_Welsh;AJ697846;location.<1..>nrfA_Welsh;487.;uncultured.bacterium.definition.cytochrome.c.nitrite.reductase  | 9E-25 |
| <i>nrfA</i> | M01935:46:000000000-AC602:1:1105<br>:22832:13746 (LC230376) | 0.24%  | nrfA_Welsh;CP006772;location.complement(2473277..2474770).;Bacteroidales.bacterium.CF.definition.Cytochrome.c-552 | 9E-99 |
| <i>nrfA</i> | M01935:46:000000000-AC602:1:1106<br>:22847:18398 (LC230377) | 0.17%  | nrfA_Welsh;AJ697848;location.<1..>nrfA_Welsh;496.;uncultured.bacterium.definition.cytochrome.c.nitrite.reductase  | 5E-17 |
| <i>nrfA</i> | M01935:46:000000000-AC602:1:1109<br>:21340:15917 (LC230378) | 0.14%  | nrfA_Welsh;FJ810664;location.<1..>nrfA_Welsh;463.;uncultured.bacterium.definition.cytochrome.c.nitrite.reductase  | 2E-10 |
| <i>napA</i> | M01935:46:000000000-AC602:1:1101<br>:20732:2948 (LC230379)  | 6.8%   | napA;EU495680;location.<1..>napA;495.;uncultured.bacterium.definition.NapA                                        | 1E-19 |
| <i>napA</i> | M01935:46:000000000-AC602:1:1101<br>:15748:5082 (LC230380)  | 2.6%   | napA;EU125408;location.<1..>napA;414.;uncultured.bacterium.definition.periplasmic.nitrate.reductase               | 2E-58 |
| <i>napA</i> | M01935:46:000000000-AC602:1:1101<br>:16494:2829 (LC230381)  | 2.0%   | napA;EU495669;location.<1..>napA;493.;uncultured.bacterium.definition.NapA                                        | 5E-34 |

|             |                                                             |       |                                                                                                                                                           |       |
|-------------|-------------------------------------------------------------|-------|-----------------------------------------------------------------------------------------------------------------------------------------------------------|-------|
| <i>napA</i> | M01935:46:000000000-AC602:1:1104<br>:28318:12525 (LC230382) | 0.97% | napA;EU495669;location.<1..>napA;493.;uncultured.bacterium.definition.NapA                                                                                | 8E-27 |
| <i>napA</i> | M01935:46:000000000-AC602:1:1103<br>:3549:6969 (LC230383)   | 0.92% | napA;CP000662;location.complement(85399..87885).;Rhodobacter.sphaeroides.ATCC.17025.definition.periplasmic.nitrate.reductase.subunit.NapA.apoprotein      | 8E-27 |
| <i>napA</i> | M01935:46:000000000-AC602:1:1104<br>:19935:17842 (LC230384) | 0.89% | napA;CP001715;location.4467228..4469753.;Candidatus.Accumulibacter.phosphatis.clade.IIA.str..UW-1.definition.periplasmic.nitrate.reductase..large.subunit | 1E-19 |
| <i>napA</i> | M01935:46:000000000-AC602:1:1103<br>:6404:3165 (LC230385)   | 0.82% | napA;EU495666;location.<1..>napA;493.;uncultured.bacterium.definition.NapA                                                                                | 1E-19 |
| <i>napA</i> | M01935:46:000000000-AC602:1:1101<br>:3732:6331 (LC230386)   | 0.72% | napA;AMXD01000089;location.4823..7369.;Thauera.aminoaromatica.S2.definition.nitrate.reductase.catalytic.subunit                                           | 6E-83 |
| <i>napA</i> | M01935:46:000000000-AC602:1:1101<br>:4822:21725 (LC230387)  | 0.58% | napA;AY305378;location.228154..230649.;Ralstonia.eutropha.H16.definition.periplasmic.nitrate.reductase.large.subunit                                      | 5E-37 |
| <i>napA</i> | M01935:46:000000000-AC602:1:1110<br>:10677:11574 (LC230388) | 0.55% | napA;EF217122;location.<1..>napA;152.;uncultured.bacterium.definition.putitative.periplasmic.nitrate.reductase.large.subunit                              | 8E-27 |
| <i>napA</i> | M01935:46:000000000-AC602:1:1101<br>:21632:15764 (LC230389) | 0.47% | napA;AMXD01000089;location.4823..7369.;Thauera.aminoaromatica.S2.definition.nitrate.reductase.catalytic.subunit                                           | 2E-52 |
| <i>napA</i> | M01935:46:000000000-AC602:1:1101<br>:18947:18165 (LC230390) | 0.28% | napA;FQ311870;location.739528..742020.;Azospirillum.lipoferum.4B.definition.periplasmic.nitrate.reductase..large.subunit                                  | 1E-62 |
| <i>napA</i> | M01935:46:000000000-AC602:1:1103<br>:22060:4743 (LC230391)  | 0.26% | napA;CP003153;location.511069..513594.;Dechlorosoma.suillum.P.S.definition.periplasmic.nitrate.reductase..large.subunit                                   | 1E-31 |

|             |                                                             |        |                                                                                                                                                            |        |
|-------------|-------------------------------------------------------------|--------|------------------------------------------------------------------------------------------------------------------------------------------------------------|--------|
| <i>napA</i> | M01935:46:000000000-AC602:1:1104<br>:19152:21780 (LC230392) | 0.24%  | napA;EF217098;location.<1.>napA;152.;uncultured.bacterium.definition.putitative.periplasmic.nitrate.reductase.large.subunit                                | 2E-27  |
| <i>napA</i> | M01935:46:000000000-AC602:1:1115<br>:23228:14875 (LC230393) | 0.18%  | napA;CP001715;location.4467228..4469753.;Candidatus.Accumuli bacter.phosphatis.clade.IIA.str..UW-1.definition.periplasmic.nitrate.reductase..large.subunit | 2E-24  |
| <i>napA</i> | M01935:46:000000000-AC602:1:1103<br>:25061:21605 (LC230394) | 0.16%  | napA;EU495673;location.<1.>napA;493.;uncultured.bacterium.definition.NapA                                                                                  | 8E-30  |
| <i>napA</i> | M01935:46:000000000-AC602:1:1101<br>:26952:13033 (LC230395) | 0.090% | napA;CP000491;location.207310..209805.;Paracoccus.denitrificans.PD1222.definition.periplasmic.nitrate.reductase.subunit.NapA.apoprotein                    | 9E-39  |
| <i>napA</i> | M01935:46:000000000-AC602:1:1107<br>:5471:22626 (LC230396)  | 0.008% | napA;CP000491;location.207310..209805.;Paracoccus.denitrificans.PD1222.definition.periplasmic.nitrate.reductase.subunit.NapA.apoprotein                    | 1E-28  |
| <i>napA</i> | M01935:46:000000000-AC602:1:1102<br>:23410:16905 (LC230397) | 0.002% | napA;EF217094;location.<1.>napA;152.;uncultured.bacterium.definition.putitative.periplasmic.nitrate.reductase.large.subunit                                | 5E-34  |
| <i>nosZ</i> | M01935:46:000000000-AC602:1:1101<br>:13149:6248 (LC230398)  | 2.6%   | nosZ;HQ625260;location.<1.702.;uncultured.bacterium.definition.nitrous.oxide.reductase                                                                     | 2E-102 |
| <i>nosZ</i> | M01935:46:000000000-AC602:1:1106<br>:10553:11894 (LC230399) | 1.9%   | nosZ;EU271710;location.<1.436.;uncultured.bacterium.definition.NosZ                                                                                        | 4E-64  |
| <i>nosZ</i> | M01935:46:000000000-AC602:1:1105<br>:16674:22851 (LC230400) | 1.2%   | nosZ;HQ625260;location.<1.702.;uncultured.bacterium.definition.nitrous.oxide.reductase                                                                     | 3E-80  |
| <i>nosZ</i> | M01935:46:000000000-AC602:1:1101<br>:4510:15814 (LC230401)  | 0.84%  | nosZ;HQ625260;location.<1.702.;uncultured.bacterium.definition.nitrous.oxide.reductase                                                                     | 2E-87  |

|             |                                                             |        |                                                                                                            |       |
|-------------|-------------------------------------------------------------|--------|------------------------------------------------------------------------------------------------------------|-------|
| <i>nosZ</i> | M01935:46:000000000-AC602:1:1101<br>:2029:11036 (LC230402)  | 0.68%  | <i>nosZ</i> ;AY425164;location.<1.457.;uncultured.bacterium.definition.nitrous.oxide.reductase             | 2E-47 |
| <i>nosZ</i> | M01935:46:000000000-AC602:1:1113<br>:16612:15928 (LC230403) | 0.30%  | <i>nosZ</i> ;FN600636;location.<1.662.;Mesorhizobium.sp..4FB11.definition.nitrous.oxide.reductase          | 3E-74 |
| <i>nosZ</i> | M01935:46:000000000-AC602:1:1111<br>:19311:7597 (LC230404)  | 0.18%  | <i>nosZ</i> ;AY325676;location.<1.663.;uncultured.bacterium.definition.putative.nitrous.oxide.reductase    | 4E-61 |
| <i>nosZ</i> | M01935:46:000000000-AC602:1:1101<br>:10554:6069 (LC230405)  | 0.16%  | <i>nosZ</i> ;EF644923;location.<1.660.;uncultured.bacterium.definition.putative.nitrous.oxide.reductase    | 2E-87 |
| <i>nosZ</i> | M01935:46:000000000-AC602:1:1111<br>:22540:13853 (LC230406) | 0.13%  | <i>nosZ</i> ;FJ209375;location.<1.754.;uncultured.bacterium.definition.putative.nitrous.oxide.reductase    | 3E-74 |
| <i>nosZ</i> | M01935:46:000000000-AC602:1:1114<br>:7872:15369 (LC230407)  | 0.092% | <i>nosZ</i> ;GU362715;location.<1.460.;uncultured.bacterium.definition.nitrous.oxide.reductase             | 4E-61 |
| <i>nosZ</i> | M01935:46:000000000-AC602:1:1103<br>:12820:19830 (LC230408) | 0.075% | <i>nosZ</i> ;HQ836615;location.<1.363.;uncultured.bacterium.definition.nitrous.oxide.reductase             | 5E-57 |
| <i>nosZ</i> | M01935:46:000000000-AC602:1:1108<br>:10820:24695 (LC230409) | 0.057% | <i>nosZ</i> ;EU083524;location.complement(<1.1093);uncultured.bacterium.definition.nitrous.oxide.reductase | 4E-95 |
| <i>nosZ</i> | M01935:46:000000000-AC602:1:1102<br>:9843:17147 (LC230410)  | 0.049% | <i>nosZ</i> ;DQ238554;location.<1.646.;uncultured.bacterium.definition.nitrous.oxide.reductase             | 8E-41 |
| <i>nosZ</i> | M01935:46:000000000-AC602:1:1111<br>:14366:15330 (LC230411) | 0.033% | <i>nosZ</i> ;JF310511;location.<1.699.;uncultured.bacterium.definition.nitrous.oxide.reductase             | 2E-44 |
| <i>nosZ</i> | M01935:46:000000000-AC602:1:1103<br>:14963:7888 (LC256818)  | 0.029% | <i>nosZ</i> ;FN859724;location.<1.700.;uncultured.bacterium.definition.nitrous.oxide.reductase             | 5E-88 |

|             |                                                             |       |                                                                                                                                                            |        |
|-------------|-------------------------------------------------------------|-------|------------------------------------------------------------------------------------------------------------------------------------------------------------|--------|
| <i>norB</i> | M01935:46:000000000-AC602:1:1101<br>:18586:4510 (LC230412)  | 3.2%  | <i>norB</i> ;AP007255;location.complement(3147718..3149037).;Magnetospirillum.magneticum.AMB-1.definition.Nitric.oxide.reductase.large.subunit             | 1E-83  |
| <i>norB</i> | M01935:46:000000000-AC602:1:1102<br>:10116:18103 (LC230209) | 3.1%  | <i>norB</i> ;CP000478;location.complement(3622744..3625020).;Syntrophohobacter.fumaroxidans.MPOB.definition.cytochrome.b.subunit.of.nitric.oxide.reductase | 1E-101 |
| <i>norB</i> | M01935:46:000000000-AC602:1:1105<br>:15356:2835 (LC230413)  | 0.79% | <i>norB</i> ;HF936747;location.<1..> <i>norB</i> ;453.;uncultured.bacterium.definition.nitric.oxide.reductase                                              | 7E-64  |
| <i>norB</i> | M01935:46:000000000-AC602:1:1105<br>:9854:23331 (LC230414)  | 0.48% | <i>norB</i> ;AM284363;location.<1..> <i>norB</i> ;432.;Paracoccus.sp..R-28245.definition.nitric.oxide.reductase.C <i>norB</i>                              | 0      |
| <i>norB</i> | M01935:46:000000000-AC602:1:1105<br>:22748:10730 (LC230415) | 0.32% | <i>norB</i> ;CP002083;location.611075..612424.;Hyphomicrobium.denitrificans.ATCC.51888.definition.Nitric-oxide.reductase                                   | 2E-64  |
| <i>norB</i> | M01935:46:000000000-AC602:1:1103<br>:13425:11348 (LC230416) | 0.32% | <i>norB</i> ;JQ480611;location.<1..> <i>norB</i> ;342.;Bosea.sp..AR3.definition.nitric.oxide.reductase                                                     | 4E-161 |
| <i>norB</i> | M01935:46:000000000-AC602:1:1109<br>:18593:3458 (LC230210)  | 0.30% | <i>norB</i> ;HQ615190;location.<1..> <i>norB</i> ;640.;uncultured.bacterium.definition.putative.nitric.oxide.reductase                                     | 3E-25  |
| <i>norB</i> | M01935:46:000000000-AC602:1:1114<br>:26962:18991 (LC230417) | 0.29% | <i>norB</i> ;AJ132911;location.769..2115.;Bradyrhizobium.japonicum.definition.nitric.oxide.reductase.subunit.B                                             | 3E-137 |
| <i>norB</i> | M01935:46:000000000-AC602:1:1111<br>:7212:9580 (LC230418)   | 0.27% | <i>norB</i> ;AP007255;location.complement(3147718..3149037).;Magnetospirillum.magneticum.AMB-1.definition.Nitric.oxide.reductase.large.subunit             | 8E-73  |
| <i>norB</i> | M01935:46:000000000-AC602:1:1103<br>:7386:8150 (LC230419)   | 0.25% | <i>norB</i> ;AFER01000001;location.complement(1455544..1456884).;Rhodobacter.sphaeroides.WS8N.definition.nitric-oxide.reductase.subu                       | 7E-67  |



## nit.B

|             |                                                             |        |                                                                                                                                    |        |
|-------------|-------------------------------------------------------------|--------|------------------------------------------------------------------------------------------------------------------------------------|--------|
| <i>norB</i> | M01935:46:000000000-AC602:1:1109<br>:20760:11693 (LC230420) | 0.25%  | norB;ACYY01000001;location.complement(156706..158070).;Rho<br>dobacter.sp..SW2.definition.Nitric-oxide.reductase                   | 3E-78  |
| <i>norB</i> | M01935:46:000000000-AC602:1:1103<br>:8005:13370 (LC230421)  | 0.24%  | norB;CU459003;location.1460427..1461764.;Magnetospirillum.gry<br>phiswaldense.MSR-1.definition.Nitric-oxide.reductase.subunit.B    | 2E-51  |
| <i>norB</i> | M01935:46:000000000-AC602:1:1105<br>:21789:14751 (LC256819) | 0.19%  | norB;HF936749;location.<1..>norB;455.;uncultured.bacterium.defi<br>nition.putative.nitric.oxide.reductase                          | 1E-52  |
| <i>norB</i> | M01935:46:000000000-AC602:1:1104<br>:6502:3578 (LC230422)   | 0.18%  | norB;CP001280;location.1637157..1638512.;Methylocella.silvestris<br>.BL2.definition.Nitric-oxide.reductase                         | 3E-57  |
| <i>norB</i> | M01935:46:000000000-AC602:1:1104<br>:19278:19332 (LC230423) | 0.16%  | norB;AM284362;location.<1..>norB;419.;Paracoccus.sp..R-28244.d<br>efinition.nitric.oxide.reductase.CnorB                           | 5E-148 |
| <i>norB</i> | M01935:46:000000000-AC602:1:1111<br>:5549:19887 (LC230424)  | 0.11%  | norB;AM284340;location.<1..>norB;435.;Rhizobium.sp..R-24658.d<br>efinition.nitric.oxide.reductase.CnorB                            | 1E-148 |
| <i>norB</i> | M01935:46:000000000-AC602:1:1105<br>:19012:3089 (LC230425)  | 0.098% | norB;CU459003;location.1460427..1461764.;Magnetospirillum.gry<br>phiswaldense.MSR-1.definition.Nitric-oxide.reductase.subunit.B    | 4E-65  |
| <i>norB</i> | M01935:46:000000000-AC602:1:1106<br>:23904:23963 (LC230426) | 0.095% | norB;CP002568;location.610943..612313.;Polymorphum.gilvum.S<br>L003B-26A1.definition.Nitric.oxide.reductase..large.subunit         | 1E-34  |
| <i>norB</i> | M01935:46:000000000-AC602:1:1106<br>:23192:14439 (LC230211) | 0.087% | norB;HQ615174;location.<1..>norB;640.;uncultured.bacterium.defi<br>nition.putative.nitric.oxide.reductase                          | 1E-21  |
| <i>norB</i> | M01935:46:000000000-AC602:1:1103<br>:14543:16054 (LC230427) | 0.079% | norB;CP000830;location.3347463..3348842.;Dinoroseobacter.shiba<br>e.DFL.12...DSM.16493.definition.nitric.oxide.reductase.subunit.B | 3E-84  |

|             |                                                             |        |                                                                                                                                                             |       |
|-------------|-------------------------------------------------------------|--------|-------------------------------------------------------------------------------------------------------------------------------------------------------------|-------|
| <i>norB</i> | M01935:46:000000000-AC602:1:1104<br>:16255:23311 (LC230212) | 0.054% | norB;AFUR01000001;location.complement(1629221..1631563).;Ac<br>tinomyces.sp..oral.taxon.175.str..F0384.definition.putative.nitric.oxi<br>de.reductase..NorZ | 1E-14 |
| <i>norB</i> | M01935:46:000000000-AC602:1:1106<br>:12993:20326 (LC230428) | 0.044% | norB;CU459003;location.1460427..1461764.;Magnetospirillum.gry<br>phiswaldense.MSR-1.definition.Nitric-oxide.reductase.subunit.B                             | 1E-65 |
| <i>norB</i> | M01935:46:000000000-AC602:1:1113<br>:6087:11288 (LC230429)  | 0.029% | norB;CP000032;location.complement(237713..239080).;Ruegeria.p<br>omeroyi.DSS-3.definition.nitric.oxide.reductase..large.subunit                             | 4E-87 |
| <i>norB</i> | M01935:46:000000000-AC602:1:1106<br>:14975:7626 (LC230213)  | 0.013% | norB;AKCV01000022;location.complement(196457..198748).;Rals<br>tonia.sp..PBA.definition.nitric.oxide.reductase.-like.protein                                | 3E-28 |
| <i>norB</i> | M01935:46:000000000-AC602:1:1114<br>:14906:13531 (LC230430) | 0.007% | norB;FQ311871;location.complement(85091..86440).;Azospirillum.<br>lipoferum.4B.definition.Nitric.oxide.reductase.(NOR)..large.subunit                       | 1E-89 |
| <i>norB</i> | M01935:46:000000000-AC602:1:1114<br>:11798:15260 (LC230431) | 0.003% | norB;HE616890;location.1000304..1001650.;Sinorhizobium.fredii.<br>HH103.definition.cytochrome.c.oxidase..subunit.I                                          | 2E-91 |
| <i>norB</i> | M01935:46:000000000-AC602:1:1103<br>:12143:7193 (LC230432)  | 0.002% | norB;CU459003;location.1460427..1461764.;Magnetospirillum.gry<br>phiswaldense.MSR-1.definition.Nitric-oxide.reductase.subunit.B                             | 1E-89 |

---

**Table S5.** Shannon ( $H'$ ) and inverse Simpson ( $1/D$ ) indices calculated for each the N cycle functional genes found in anaerobic granular sludge (UASB-L and UASB-M) samples. ND; gene not detected.

|             | UASB-L |       | UASB-M |       |
|-------------|--------|-------|--------|-------|
|             | $H'$   | $1/D$ | $H'$   | $1/D$ |
| <i>nxrB</i> | 0.36   | 1.26  | ND     | ND    |
| <i>nirK</i> | 1.85   | 9.64  | 3.07   | 16.5  |
| <i>nirS</i> | 1.24   | 8.65  | 1.79   | 4.15  |
| <i>nifH</i> | 2.91   | 9.95  | 2.56   | 8.23  |
| <i>nrfA</i> | 2.16   | 6.28  | 1.30   | 2.97  |
| <i>napA</i> | 2.90   | 13.8  | 2.19   | 5.53  |
| <i>nosZ</i> | 2.64   | 11.6  | 1.95   | 5.25  |
| <i>norB</i> | 2.08   | 4.95  | 2.28   | 5.60  |
| <i>narG</i> | 0.53   | 1.54  | ND     | ND    |

**Table S6.** Correlations between transcript quantities measured by the NiCE chip and those measured by conventional qPCR. Numbers shown below each target gene indicate assay ID used in Fig. 2.

| Test methods                         | <i>nirS</i> |     | <i>cnorB</i> |     | <i>amoA</i> |    | <i>nirK</i> |    | <i>nosZ</i> clade I |     |
|--------------------------------------|-------------|-----|--------------|-----|-------------|----|-------------|----|---------------------|-----|
|                                      | 25          | 26  | 26           | 26  | 3           | 24 | 24          | 30 | 30                  |     |
| Pearson's product-moment correlation | 0.88        | *** | 0.79         | *** | 0.38        | *  | 0.13        | ns | 0.81                | *** |
| Spearman's rank correlation          | 0.83        | *** | 0.80         | *** | 0.49        | ** | 0.23        | ns | 0.85                | *** |
| Kendall's rank correlation           | 0.69        | *** | 0.64         | *** | 0.36        | ** | 0.16        | ns | 0.66                | *** |

*p* values: \*, <0.05; \*\*, <0.01; \*\*\*, <0.001; ns, not significant (>0.05)
